# Supplementary material for: Derived alleles of two axis proteins affect meiotic traits in autotetraploid Arabidopsis arenosa
Source: PubMed Central journal article supplement (PMC7183234; doi:10.1073/pnas.1919459117), 2020-04-09
Supplement: pnas.1919459117.sapp.pdf [file pnas.1919459117.sapp.pdf]

Supplementary Information for

**Derived alleles of two axis proteins affect meiotic traits in autotetraploid  
*Arabidopsis arenosa***

**Chris Morgan<sup>1, §</sup>, Huakun Zhang<sup>1,2, §</sup>, Clare E. Henry<sup>1</sup>, F. Chris H. Franklin<sup>3</sup>,  
Kirsten Bomblies<sup>\*,1,4</sup>**

1. John Innes Centre, Department of Cell and Developmental Biology, Colney Lane, Norwich, NR4 7UH, UK.
  2. Key Laboratory of Molecular Epigenetics of Ministry of Education, Northeast Normal University, Changchun 130024, China
  3. School of Biosciences, The University of Birmingham, Edgbaston, Birmingham, B15 2TT, UK.
  4. Institute of Molecular Plant Biology, Department of Biology, ETH, Universitätsstrasse 2, 8092 Zürich, Switzerland.
- § These authors contributed equally.

Author for correspondence: Email: [Kirsten.bomblies@biol.ethz.ch](mailto:Kirsten.bomblies@biol.ethz.ch)

**This PDF file includes:**

Figures S1 to S5  
Tables S1 to S8  
SI References

Separate files are provided that contain .csv files with sample datasets and sample R scripts for GLMM.



**Figure S1.** Alignment of ASY1 protein sequences. ASY1\_2XSN\_Cons and ASY1\_4XTBG\_Cons are consensus sequences from short read sequencing published in Monnahan et al 2019 (1) from the diploid SN population from which our colchipooids were generated, and TBG, the tetraploid from which all of the T alleles, and the D alleles used in the ASY1 experiment were derived. ASY1\_D and ASY1\_T-1 and ASY1\_T-2 are D and T allele cDNAs. Polymorphisms marked in black that differentiate D and T alleles are identical to those previously reported and described in detail in Wright et al 2015 (2). There are three additional polymorphisms in the D allele that were not previously reported (highlighted in blue). The D allele carries three additional amino acid changes not previously detected (highlighted in blue), and the consensus sequence has four calls not represented in the cDNAs (red). Arrowhead indicates a presence/absence polymorphism of Q365 that arises from alternate splicing; this occurs in both diploids and tetraploids. A yellow bar below the alignment marks the conserved HORMA domain and green marks a SWIRM domain. The red boxes in the SN consensus sequence represent sites where the consensus calculated from short read data deviates from all sequences we obtained from cDNA in both ploidyies.

**Figure S2: Alignments of ASY3 D and T alleles.**

|                                        |                                                                                                                                                       |                    |
|----------------------------------------|-------------------------------------------------------------------------------------------------------------------------------------------------------|--------------------|
| ASY3_4X_TBG_CONS                       | MSDYRSFGSNYHPSSHSRKISIGVMADSQPKRNLPDKDDGDVIARVEKLKSAFVTDLQA                                                                                           | 60                 |
| DDTT4_T_ALLELE                         | MSDYRSFGSNYHPSSHRSRKISIGVMADSQPKRNLPDKDDGDVIARVEKLKSAFVTDLQA                                                                                          | 60                 |
| TRE1_T                                 | MSDYRSFGSNYHPSSHSRKISIGVMADSQPKRNLPDKDDGDVIARVEKLKSAFVTDLQA                                                                                           | 60                 |
| DDTT1_D_ALLELE                         | MSDYRSFGSNYHPSSQSRKISIGVMADSQPKRNLPNKDDGDVIARA <del>E</del> KLKSAFVTDLQV                                                                              | 60                 |
| ASY3_2X_SN_CONS                        | MSDYRSFGSNYHPSSQSRKISIGVMADSQPKRNLPNKDDGDV <del>L</del> ARVEKLKSAFVTDLQA                                                                              | 60                 |
|                                        |                                                                                                                                                       |                    |
| ASY3_4X_TBG_CONS                       | NKKDKGDLAAKQRNSAQVTGHVTS <del>P</del> WRS <del>P</del> RS <del>S</del> HRKSGTLESVLCKQTSSLSGSKGLTKGL                                                   | 120                |
| DDTT4_T_ALLELE                         | NKKDKGDLAAKQRNSAQVTGHVTS <del>P</del> WRS <del>P</del> RS <del>S</del> HRKSGTLESVLCKQTSSLSGSKGLTKGL                                                   | 120                |
| TRE1_T                                 | NKKDKGDLAAKQRNSAQVTGHVTS <del>P</del> WRS <del>P</del> RS <del>S</del> HRKSGTLESVLCKQTSSLSGSKGLTKGL                                                   | 120                |
| DDTT1_D_ALLELE                         | <del>K</del> NKKDKGDLAAKQRNSAQVTGHVTS <del>P</del> WRS <del>P</del> RS <del>S</del> HRK <del>L</del> GTLE <del>N</del> VLCKQTSSLSGSKGLNKGL            | 120                |
| ASY3_2X_SN_CONS                        | NKKDKGDLAAKQRNSAQVTGHVT <del>P</del> WRS <del>P</del> RS <del>S</del> HRK <del>L</del> GTLESVLCKQTSSLSGSKGLNKGL                                       | 120                |
|                                        |                                                                                                                                                       |                    |
| ASY3_4X_TBG_CONS                       | NGAHPAPARDSF <del>P</del> NFP <del>I</del> SSPQ <del>Q</del> SHGELNGGRNDTVMDRSPERMEDPPSAVLLQKVASQRE                                                   | 180                |
| DDTT4_T_ALLELE                         | NGAHPAPARDSF <del>P</del> NFP <del>I</del> SSPQ <del>Q</del> SHGELNGGRNDTVMDRSPERMEDPPSAVLLQKVASQRE                                                   | 180                |
| TRE1_T                                 | NGAHPAPARDSF <del>P</del> NFP <del>I</del> SSPQ <del>Q</del> SHGELNGGRNDTVMDRSPERMEDPPSAVLLQKVASQRE                                                   | 180                |
| DDTT1_D_ALLELE                         | NGAHP <del>V</del> PARDSF <del>P</del> NFP <del>I</del> SSPQ <del>Q</del> SHGELNGGR <del>N</del> TVMDRSPERMEDPPSAVLLQKVASQRE                          | 180                |
| ASY3_2X_SN_CONS                        | NGAHPAPARDSF <del>P</del> NFP <del>I</del> SSPQ <del>Q</del> SHGELNGGRNDTVMDR <del>T</del> SERMEDPPSAVLLQKVASQRE                                      | 180                |
|                                        |                                                                                                                                                       |                    |
| ASY3_4X_TBG_CONS                       | MDKPDKEKNGTTV <del>V</del> LR <del>S</del> KLWEILGKASTANNEDVNSATPEVEKTNFKLSQDKGSND <del>D</del> PLI                                                   | 240                |
| DDTT4_T_ALLELE                         | MDKPDKEKNGTTV <del>V</del> LR <del>S</del> KLWEILGKASTANNEDVNSATPEVEKTNFKLSQDKGSND <del>D</del> PLI                                                   | 240                |
| TRE1_T                                 | MDKPDKEKNGTTV <del>V</del> LR <del>S</del> KLWEILGKASTANNEDVNSATPEVEKTNFKLSQDKGSND <del>D</del> PLI                                                   | 240                |
| DDTT1_D_ALLELE                         | MDKPDKEKNGTT <del>D</del> VLR <del>S</del> KLWEILGKAS <del>P</del> ANNEDVNS <del>E</del> TPEVEKTNF <del>R</del> LSQDKGSND <del>D</del> V <del>I</del> | 240                |
| ASY3_2X_SN_CONS                        | MDKPDKEKNGTT <del>D</del> VLR <del>S</del> KLWEILGKAS <del>P</del> ANNEDVNS <del>E</del> TPEVEKTNFKLSQDKGSND <del>D</del> PLI                         | 240                |
|                                        |                                                                                                                                                       |                    |
| ASY3_4X_TBG_CONS                       | KPRHNSDSIETDSESPENATRRPV <del>I</del> RS <del>V</del> LQRRVGT <del>K</del> GVQKRTKAGANLGRKSTEQVNDVF                                                   | 300                |
| DDTT4_T_ALLELE                         | KPRHNSDSIETDSESPENATRRPV <del>I</del> RS <del>V</del> LQRRVGT <del>K</del> GVQKRTKAGANLGRKSTEQVNDVF                                                   | 300                |
| TRE1_T                                 | KPRHNSDSIETDSESPENATRRPV <del>I</del> RS <del>V</del> LQRRVGT <del>K</del> GVQKRTKAGANLGRKSTEQVNDVF                                                   | 300                |
| DDTT1_D_ALLELE                         | KPRHNSDSIETDSESP <del>E</del> ATRRPV <del>I</del> RS <del>L</del> LQR <del>V</del> GAKGVQKRTKAGANLGRKSTEQVNNVF                                        | 300                |
| ASY3_2X_SN_CONS                        | KPRHNSDSIETDSESPENATRRPV <del>I</del> RS <del>L</del> LQRRV <del>G</del> A <del>K</del> GVQKRTKAGANLGRKSTEQVNNVF                                      | 300                |
|                                        |                                                                                                                                                       |                    |
| ASY3_4X_TBG_CONS                       | SFEEGLRGKIGTAMNSSVIPKKQRGRKNTVVQCRKAHFRR <del>K</del> DEADGSRKEASK <del>N</del> T <del>P</del> PR                                                     | 360                |
| DDTT4_T_ALLELE                         | SFEEGLRGKIGTAMNSSVIPKKQRGRKNTVVQCRKAHFRR <del>K</del> DEADGSRKEASK <del>N</del> T <del>P</del> PR                                                     | 360                |
| TRE1_T                                 | SFEEGLRGKIGTAMNSSVIPKKQRGRKNTVVQCRKAHFRR <del>K</del> DEADGSRKEASK <del>N</del> T <del>P</del> PR                                                     | 360                |
| DDTT1_D_ALLELE                         | SFEEGLRGKIGTAMNSSV <del>M</del> PKKQRGRKNTVVQCRKAHFRR <del>N</del> DEADGSRKE <del>T</del> SK <del>S</del> N <del>T</del> PR                           | 360                |
| ASY3_2X_SN_CONS                        | SFEEGLRGKIGTAMNSSVIPKKQ <del>R</del> A <del>R</del> RRKNTVVQCRKAHFRR <del>N</del> DEADGSR <del>H</del> KEASK <del>S</del> N <del>T</del> PR           | 360                |
|                                        |                                                                                                                                                       |                    |
| ASY3_4X_TBG_CONS                       | SESTGTGKRSSFSDKKGSS <del>Q</del> DLHPQSKARKQKPDISTREGDFHPSPEAETAAMP <del>F</del> QGL                                                                  | 420                |
| DDTT4_T_ALLELE                         | SESTGTGKRSSFSDKKGSS <del>Q</del> DLHPQSKARKQKPDISTREGDFHPSPEAETAAMP <del>F</del> QGL                                                                  | 420                |
| TRE1_T                                 | SESTGTGKRSSFSDKKGSS <del>Q</del> DLHPQSKARKQKPDISTREGDFHPSPEAETAAMP <del>F</del> QGL                                                                  | 420                |
| DDTT1_D_ALLELE                         | SESTGTGKRSSFSDKKGSS <del>H</del> DLHPQSKARKQKPDISTREGDFHPSPEAETAAMP <del>F</del> QGL                                                                  | 420                |
| ASY3_2X_SN_CONS                        | SESTGTGKRSSFSDKK <del>E</del> SS <del>H</del> DLHPQSKA <del>Q</del> K <del>K</del> KPDISTREGDFHPSPEAETAAMP <del>F</del> QGL                           | 420                |
|                                        |                                                                                                                                                       |                    |
| ASY3_4X_TBG_CONS                       | SKNGEKHERPSN <del>I</del> FMEKSVEPENEFQSPTFGYKAPISSPSPCFSP <del>E</del> ASPLQPRNISPTLE                                                                | 480                |
| DDTT4_T_ALLELE                         | SKNGEKHERPSN <del>I</del> FMEKSVEPENEFQSPTFGYKAPISSPSPCFSP <del>E</del> ASPLQPRNISPTLE                                                                | 480                |
| TRE1_T                                 | SKNG <del>K</del> KHERPSN <del>I</del> FMEKSVEPENEFQSPTFGYKAPISSPSPCFSP <del>E</del> ASPLQPRNISPTLE                                                   | 480                |
| DDTT1_D_ALLELE                         | SKNGEKHERPSN <del>V</del> FMEKS <del>T</del> EPENEFQSPTFGYKAPISSPSP <del>C</del> SP <del>E</del> ASPLQ <del>P</del> NI <del>S</del> PTLE              | 480                |
| ASY3_2X_SN_CONS                        | SKNGEKHERPSN <del>V</del> FMEKSVEPENEFQSPTFGYKAPISSPSPCFSP <del>E</del> V <del>S</del> PLQPRNISPTLE                                                   | 480                |
|                                        |                                                                                                                                                       |                    |
| ASY3_4X_TBG_CONS                       | EMETPIFSFGTKKNSQGTGQASD <del>T</del> ERRLP <del>E</del> FLEKK-----                                                                                    | 516                |
| DDTT4_T_ALLELE                         | EMETPIFSFGTKKNSQGTGQASD <del>T</del> ERRLP <del>E</del> FLEKKRDYSFRRESSPEPKEDLVLS <del>D</del> SSS                                                    | 540                |
| TRE1_T                                 | EMETPIFSFGTKKNSQGT <del>T</del> AQASD <del>T</del> ERRLP <del>E</del> FLEKKRDYSFRRESSPEPKEDLVLS <del>D</del> SSS                                      | 540                |
| DDTT1_D_ALLELE                         | ETETPIFSFGTKK <del>T</del> SQGTGQASD <del>T</del> ERRLP <del>D</del> FLEKK-----                                                                       | 516                |
| ASY3_2X_SN_CONS                        | ETETPIFSFGTKK <del>T</del> SQGTGQASD <del>T</del> ERRLP <del>D</del> FLEKK-----                                                                       | 516                |
|                                        |                                                                                                                                                       | XXXXXXXXXXXXXXXXXX |
| (X=predicted SUMOylation site, T only) |                                                                                                                                                       |                    |
|                                        |                                                                                                                                                       |                    |
| ASY3_4X_TBG_CONS                       | --RDYSFRRESSPEPKEDLVLS <del>D</del> SS\$DERSDSGSGEDSPVLGHNNSPEERK <del>T</del> SNWSNEKS                                                               | 574                |
| DDTT4_T_ALLELE                         | DERDYSFRRESSPEPKEDLVLS <del>D</del> SS\$DERSDSGSGEDSPVLGHNNSPEERK <del>T</del> SNWSNEKS                                                               | 600                |
| TRE1_T                                 | DERDYSFRRESSPEPKEDLVLS <del>D</del> SS\$DERSDSGSGEDSPVLGHNNSPEERK <del>T</del> SNWSNEKS                                                               | 600                |
| DDTT1_D_ALLELE                         | --RDYSFRRESSPE <del>N</del> EDLVLS <del>D</del> SS\$DERSDSGSGEDSPVLGHNNSPEERK <del>T</del> ANWSNEKS                                                   | 574                |
| ASY3_2X_SN_CONS                        | --RDYSFRRESSPE <del>N</del> EDLVLS <del>D</del> SS\$DERSDSGSGEDSPVL <del>S</del> HNNSPEERK <del>T</del> ANWSNEKS                                      | 574                |
|                                        |                                                                                                                                                       | XXXXXXXXXXXXXXXXXX |
| (X=predicted SUMOylation site, T only) |                                                                                                                                                       |                    |

|                  |                                                               |     |
|------------------|---------------------------------------------------------------|-----|
| ASY3_4X_TBG_CONS | KLGSSSAKRNSNLKGIGRVVLSPPSSLSKGDIDKTSFQHCSEMDEDEDEGLGRAVALFAM  | 634 |
| DDTT4_T_ALLELE   | KLGSSSAKRNSNLKGIGRVVLSPPSSLSKGDIDKTSFQHCSEMDEDEDEGLGRAVALFAM  | 660 |
| TRE1_T           | KLGSSSAKRNSNLKGIGRVVLSPPSSLSKGDIDKTSFQHCSEMDEDEDEGLGRAVALFAM  | 660 |
| DDTT1_D_ALLELE   | KLGSSSAKRNSNLKGIGRVVLSPPSSLSKGDIDKTSFQHCSEMDEDEDEGLGRAVALFAM  | 634 |
| ASY3_2X_SN_CONS  | KLGSSSAKRNSNLKGIGRVVLSPPSSLSKGDIDKTSFQHCSEMDEDEDEGLGRAVALFAM  | 634 |
|                  |                                                               |     |
| ASY3_4X_TBG_CONS | ALQNFEEKLKSAAEKKSSSEIIASVSEEIHLELENVKSHIITEAGKTSNLAKTKRKHAETR | 694 |
| DDTT4_T_ALLELE   | ALQNFEEKLKSAAEKKSSSEIIASVSEEIHLELENVKSHIITEAGKTSNLAKTKRKHAETR | 720 |
| TRE1_T           | ALQNFEEKLKSAAEKKSSSEIIASVSEEIHLELENVKSHIITEAGKTSNLAKTKRKHAETR | 720 |
| DDTT1_D_ALLELE   | ALQNFEEKLKSAAEKKSSSEIIASVSEEIHLELENVKSHIITEAGKTSNLAKTKRKHAETR | 694 |
| ASY3_2X_SN_CONS  | ALQNFEEKLKSAAEKKSSSEIIASVSEEIHLELENVKSHIITEAGKTSNLAKTKRKHAETR | 694 |
|                  |                                                               |     |
| ASY3_4X_TBG_CONS | LQEQQEKMRMIHEKFKDDVSHHLEDFKSTIEELEGNHSELKGSIKKQRTSHQKLI AHFEG | 754 |
| DDTT4_T_ALLELE   | LQEQQEKMRMIHEKFKDDVSHHLEDFKSTIEELEGNHSELKGSIKKQRTSHQKLI AHFEG | 780 |
| TRE1_T           | LQEQQEKMRMIHEKFKDDVSHHLEDFKSTIEELEGNHSELKGSIKKQRTSHQKLI AHFEG | 780 |
| DDTT1_D_ALLELE   | LQEQQEKMRMIHEKFKDDVSHHLEDFKSTIEELEGNHSELKGSIKKQRTSHQKLI AHFEG | 754 |
| ASY3_2X_SN_CONS  | LQEQQEKMRMIHEKFKDDVSHHLEDFKSTIEELEGNHSELKGSIKKQRTSHQKLI AHFEG | 754 |
|                  | XXXXXXXXXXXXXXXXXXXX                                          |     |
|                  |                                                               |     |
| ASY3_4X_TBG_CONS | GIETKLDNATKRIDSVNKSARGKMLQLKMIVAECLRDD                        | 792 |
| DDTT4_T_ALLELE   | GIETKLDNATKRIDSVNKSARGKMLQLKMIVAECLRDD                        | 818 |
| TRE1_T           | GIETKLDNATKRIDSVNKSARGKMLQLKMIVAECLRDD                        | 818 |
| DDTT1_D_ALLELE   | GIETKLDNATKRIDSVNKSARGKMLQLKMIVAECLRDD                        | 792 |
| ASY3_2X_SN_CONS  | GIETKLDNATKRIDSVNKSARGKMLQLKMIVAECLRDD                        | 792 |

**Figure S2.** Alignment of ASY3 protein sequences. ASY3\_2X\_SN\_Cons and ASY1\_4X\_TBG\_Cons are consensus sequences from short read sequencing published in (1) from the diploid SN population from which our colchipooids were generated, and TBG, the tetraploid from which all of the tetraploid alleles were derived. DDTT1 and DDTT4 are two cDNA sequences from a heterozygous tetraploid showing the D vs T alleles. All previously identified amino acid differences between the diploid and tetraploid alleles (2) could be confirmed from our sequencing (highlighted in black), and we found five additional amino acid changes (highlighted in red). The boxes highlighted in grey with white lettering (outside the duplication region) are amino acid differences between in any one sequence in the alignment, but not generally differentiated between ploidies.

The T allele has a duplication relative to the diploid sequence (highlighted in dark grey, duplicated sequence boxed), but also relative to the short-read consensus sequence for the tetraploids. To establish whether this duplication is characteristic of the tetraploids and its absence from the consensus an artefact of short read alignment, we sequenced cDNAs from an additional tetraploid population that lacks diploid alleles (TRE) and found that this allele also has the insertion suggesting that it is characteristic of the T allele. The duplication contains two polymorphisms in the adjacent region that are characteristic of the tetraploid, suggesting the duplication occurred in the context of an allele that already had these two amino acid differences.

Predicted SUMOylation consensus sites are marked with X's below the alignment. One of these is in the duplicated region and contains an amino acid difference between diploids and tetraploids such that in tetraploids there are two predicted SUMOylation sites and in the diploid allele, the site is not predicted to be SUMOylated (SUMOylation sites predicted by GPS-SUMO: <http://sumosp.biocuckoo.org/online.php>).

**Figure S3: Scatterplots of HEI10 foci per cell and total SC length per cell ( $\mu\text{m}$ ) in ASY1/ASY3 genotypes.**

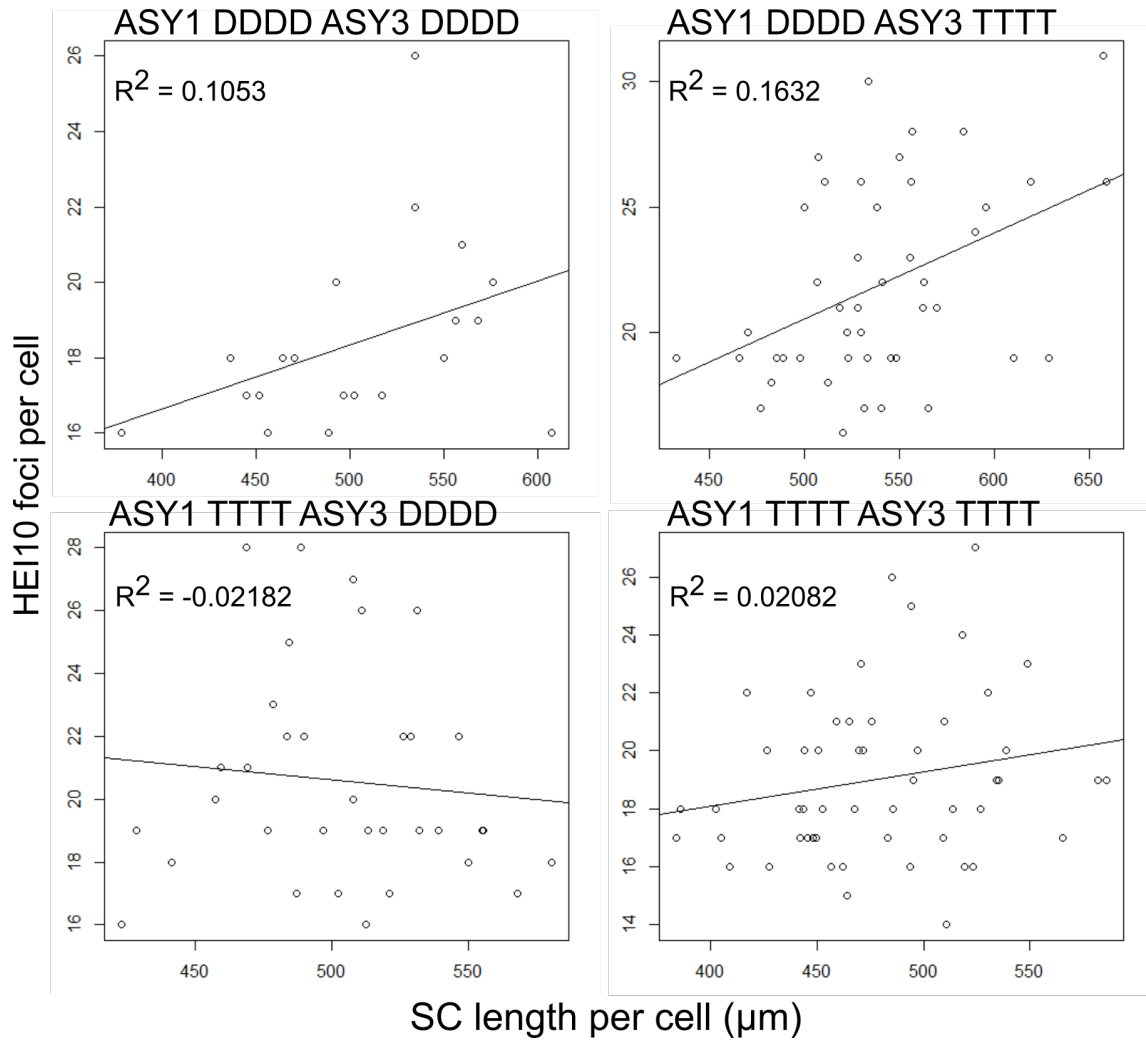

**Figure S3:** Scatterplots with fitted linear regression lines showing the relationship between the number of HEI10 foci per cell and total SC length per cell ( $\mu\text{m}$ ) in different ASY1/ASY3 genotypes.

**Figure S4: Using 4-colour SIM to determine CO positions along component chromosomes in tetraploid pachytene cells.**

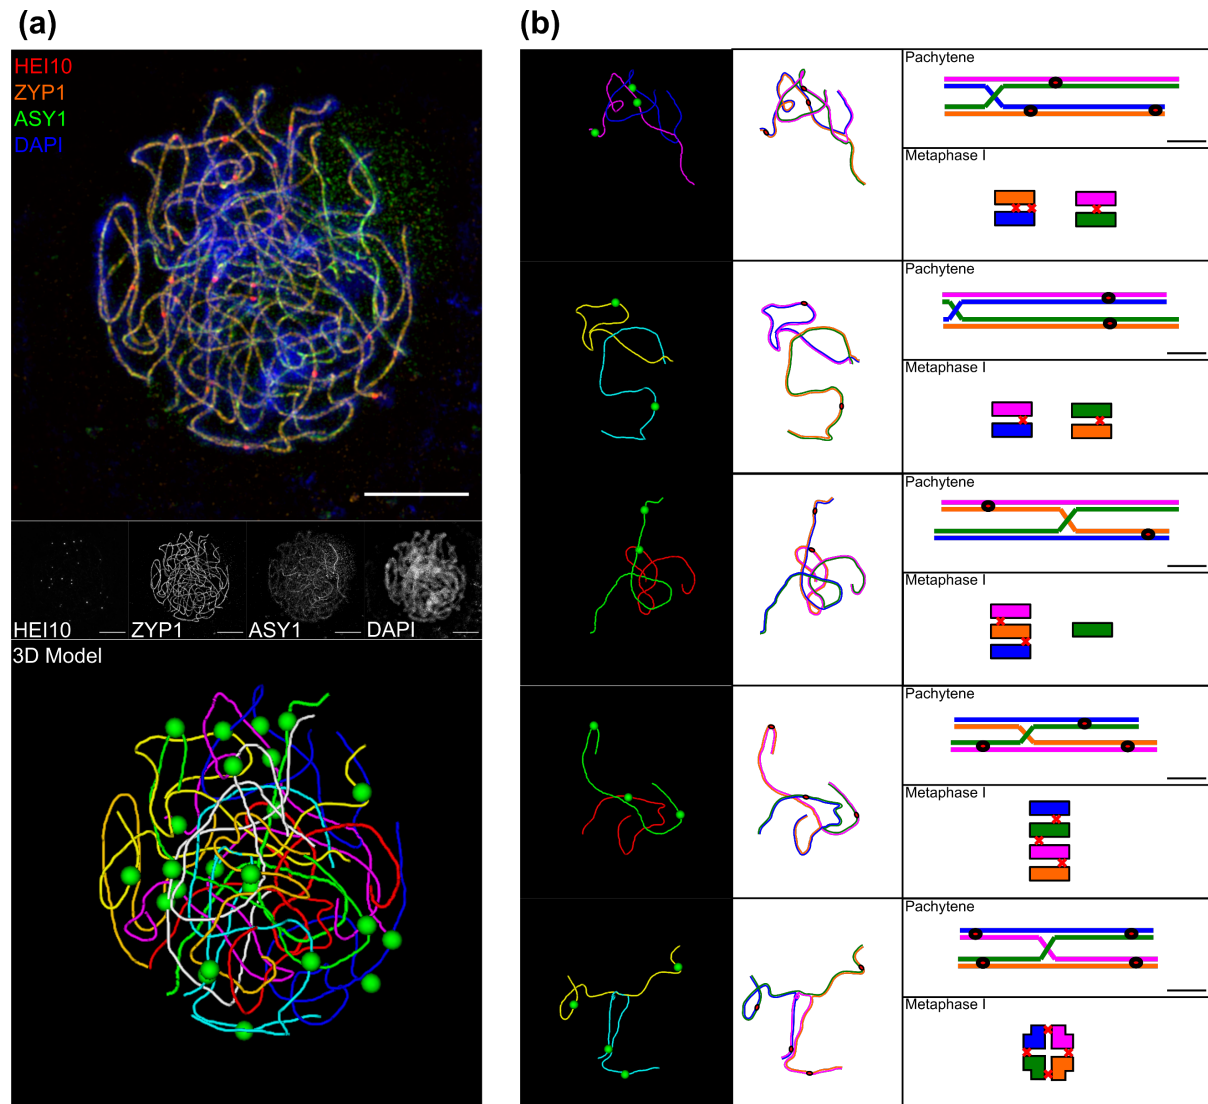

**Figure S4: Using 4-colour SIM to determine CO positions along component chromosomes in tetraploid pachytene cells.** (a) A tetraploid cell stained for HEI10, ASY1, ZYP1 and DAPI and imaged with 3D-SIM. A 3D rendering of the cell is shown in which different traced pairs of synapsed component chromosomes are labelled in different colours and green spheres show the positions of HEI10 foci. (b) This cell contains seven synaptic multivalents. The 3D traces of five synaptic multivalents are shown as well as a diagram illustrating the synaptic behaviour of each component chromosome (labelled in different colours) and the positions of HEI10 foci (red dots). A simplified diagram of the component chromosome interactions (scales bar 5 microns) and the expected metaphase I outcome following removal of the SC are also shown (red crosses = chiasma).

**Figure S5: Crossover / SPS configurations predicted metaphase I outcomes.**

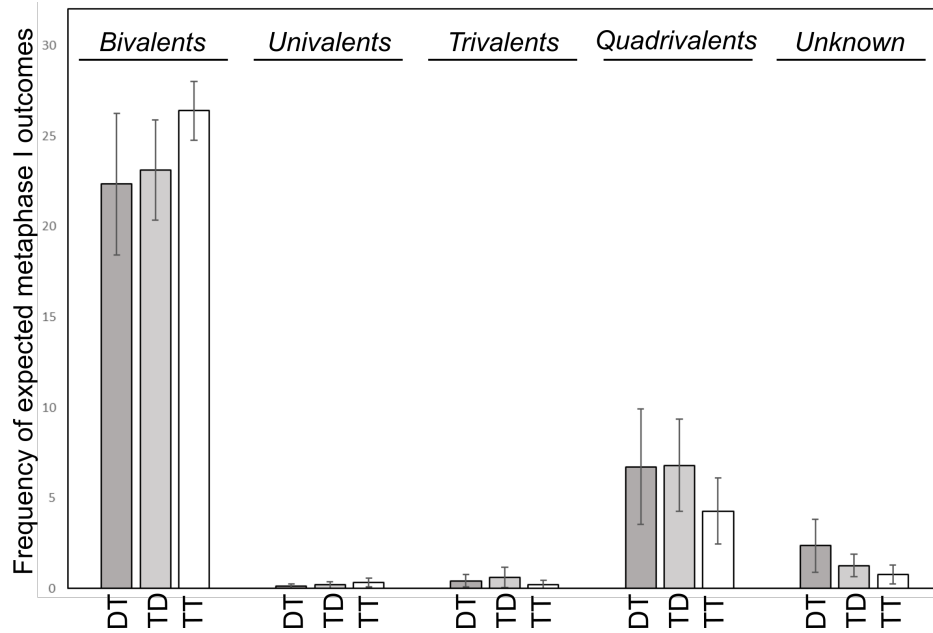

**Figure S5.** The frequency (in chromosomes per cell) of expected metaphase I outcomes based on pachytene late-HEI10/SPS site position in DT, TD and TT individuals. Unknown metaphase I outcomes arise from situations where HEI10 foci are separated by two or more SPS sites. Plots show the unweighted mean values from 4-5 individuals from each genotype  $\pm$  sample standard deviation.



**Table S1:** Cytological trait values for *A. arenosa* tetraploids homozygous for diploid or tetraploid alleles of ASY1

| Image | Genotype   | Exp | Proportions (out of total scorable bivalents) |   |   |    |    |      |      |      |      |      | EstCO/Bv | MV |
|-------|------------|-----|-----------------------------------------------|---|---|----|----|------|------|------|------|------|----------|----|
|       |            |     | O                                             | + | † | I  | Ts | O    | +    | †    | I    |      |          |    |
| S-10  | SN29 (Dip) | 1   | 2                                             | 2 | 2 | 2  | 8  | 0.25 | 0.25 | 0.25 | 0.25 | 1.25 |          |    |
| S-104 | SN29 (Dip) | 1   | 3                                             | 2 | 2 | 1  | 8  | 0.38 | 0.25 | 0.25 | 0.13 | 1.38 |          |    |
| S_105 | SN29 (Dip) | 1   | 1                                             | 2 | 0 | 4  | 7  | 0.14 | 0.29 | 0.00 | 0.57 | 1.14 |          |    |
| S_106 | SN29 (Dip) | 1   | 3                                             | 1 | 2 | 1  | 7  | 0.43 | 0.14 | 0.29 | 0.14 | 1.43 |          |    |
| S_110 | SN29 (Dip) | 1   | 1                                             | 6 | 1 | 0  | 8  | 0.13 | 0.75 | 0.13 | 0.00 | 1.13 |          |    |
| S_112 | SN29 (Dip) | 1   | 1                                             | 3 | 1 | 1  | 6  | 0.17 | 0.50 | 0.17 | 0.17 | 1.17 |          |    |
| S_12  | SN29 (Dip) | 1   | 1                                             | 2 | 3 | 1  | 7  | 0.14 | 0.29 | 0.43 | 0.14 | 1.14 |          |    |
| S_127 | SN29 (Dip) | 1   | 4                                             | 1 | 3 | 0  | 8  | 0.50 | 0.13 | 0.38 | 0.00 | 1.50 |          |    |
| S_128 | SN29 (Dip) | 1   | 2                                             | 4 | 1 | 0  | 7  | 0.29 | 0.57 | 0.14 | 0.00 | 1.29 |          |    |
| S_131 | SN29 (Dip) | 1   | 2                                             | 1 | 1 | 1  | 5  | 0.40 | 0.20 | 0.20 | 0.20 | 1.40 |          |    |
| S_132 | SN29 (Dip) | 1   | 0                                             | 5 | 0 | 3  | 8  | 0.00 | 0.63 | 0.00 | 0.38 | 1.00 |          |    |
| S_134 | SN29 (Dip) | 1   | 0                                             | 3 | 2 | 2  | 7  | 0.00 | 0.43 | 0.29 | 0.29 | 1.00 |          |    |
| S_135 | SN29 (Dip) | 1   | 1                                             | 6 | 0 | 1  | 8  | 0.13 | 0.75 | 0.00 | 0.13 | 1.13 |          |    |
| S_144 | SN29 (Dip) | 1   | 3                                             | 2 | 1 | 1  | 7  | 0.43 | 0.29 | 0.14 | 0.14 | 1.43 |          |    |
| S_151 | SN29 (Dip) | 1   | 1                                             | 4 | 1 | 1  | 7  | 0.14 | 0.57 | 0.14 | 0.14 | 1.14 |          |    |
| S_154 | SN29 (Dip) | 1   | 0                                             | 2 | 5 | 1  | 8  | 0.00 | 0.25 | 0.63 | 0.13 | 1.00 |          |    |
| S_21  | SN29 (Dip) | 1   | 1                                             | 3 | 3 | 1  | 8  | 0.13 | 0.38 | 0.38 | 0.13 | 1.13 |          |    |
| S_3   | SN29 (Dip) | 1   | 2                                             | 4 | 1 | 1  | 8  | 0.25 | 0.50 | 0.13 | 0.13 | 1.25 |          |    |
| S_57  | SN29 (Dip) | 1   | 0                                             | 4 | 2 | 2  | 8  | 0.00 | 0.50 | 0.25 | 0.25 | 1.00 |          |    |
| S_59  | SN29 (Dip) | 1   | 1                                             | 2 | 1 | 1  | 5  | 0.20 | 0.40 | 0.20 | 0.20 | 1.20 |          |    |
| S_70  | SN29 (Dip) | 1   | 1                                             | 3 | 1 | 2  | 7  | 0.14 | 0.43 | 0.14 | 0.29 | 1.14 |          |    |
| S_72  | SN29 (Dip) | 1   | 0                                             | 3 | 2 | 3  | 8  | 0.00 | 0.38 | 0.25 | 0.38 | 1.00 |          |    |
| S_91  | SN29 (Dip) | 1   | 1                                             | 4 | 2 | 1  | 8  | 0.13 | 0.50 | 0.25 | 0.13 | 1.13 |          |    |
| S_92  | SN29 (Dip) | 1   | 1                                             | 5 | 1 | 1  | 8  | 0.13 | 0.63 | 0.13 | 0.13 | 1.13 |          |    |
| S_98  | SN29 (Dip) | 1   | 0                                             | 3 | 2 | 1  | 6  | 0.00 | 0.50 | 0.33 | 0.17 | 1.00 |          |    |
| 21    | TBG-2 TTTT | 1   | 0                                             | 1 | 5 | 10 | 16 | 0.00 | 0.06 | 0.31 | 0.63 | 1.00 | 0        |    |
| 22    | TBG-2 TTTT | 1   | 1                                             | 3 | 4 | 3  | 11 | 0.09 | 0.27 | 0.36 | 0.27 | 1.09 | 1        |    |
| 36    | TBG-2 TTTT | 1   | 0                                             | 3 | 4 | 4  | 11 | 0.00 | 0.27 | 0.36 | 0.36 | 1.00 | 0        |    |
| 50    | TBG-2 TTTT | 1   | 1                                             | 5 | 2 | 1  | 9  | 0.11 | 0.56 | 0.22 | 0.11 | 1.11 | 1        |    |
| 58    | TBG-2 TTTT | 1   | 0                                             | 4 | 6 | 5  | 15 | 0.00 | 0.27 | 0.40 | 0.33 | 1.00 | 0        |    |
| 70    | TBG-2 TTTT | 1   | 0                                             | 5 | 7 | 3  | 15 | 0.00 | 0.33 | 0.47 | 0.20 | 1.00 | 1        |    |
| 82    | TBG-2 TTTT | 1   | 2                                             | 1 | 3 | 8  | 14 | 0.14 | 0.07 | 0.21 | 0.57 | 1.14 | 0        |    |
| 83    | TBG-2 TTTT | 1   | 0                                             | 7 | 6 | 3  | 16 | 0.00 | 0.44 | 0.38 | 0.19 | 1.00 | 0        |    |
| 86    | TBG-2 TTTT | 1   | 2                                             | 5 | 1 | 6  | 14 | 0.14 | 0.36 | 0.07 | 0.43 | 1.14 | 1        |    |
| 98    | TBG-2 TTTT | 1   | 1                                             | 2 | 4 | 6  | 13 | 0.08 | 0.15 | 0.31 | 0.46 | 1.08 | 0        |    |
| 100   | TBG-2 TTTT | 1   | 0                                             | 3 | 4 | 6  | 13 | 0.00 | 0.23 | 0.31 | 0.46 | 1.00 | 1        |    |
| 121   | TBG-2 TTTT | 1   | 2                                             | 0 | 1 | 13 | 16 | 0.13 | 0.00 | 0.06 | 0.81 | 1.13 | 1        |    |
| 138   | TBG-2 TTTT | 1   | 1                                             | 2 | 0 | 8  | 11 | 0.09 | 0.18 | 0.00 | 0.73 | 1.09 | 0        |    |
| 143   | TBG-2 TTTT | 1   | 3                                             | 4 | 5 | 4  | 16 | 0.19 | 0.25 | 0.31 | 0.25 | 1.19 | 0        |    |
| 155   | TBG-2 TTTT | 1   | 2                                             | 1 | 2 | 9  | 14 | 0.14 | 0.07 | 0.14 | 0.64 | 1.14 | 0        |    |

|     |                    |   |   |   |    |    |    |      |      |      |      |      |   |
|-----|--------------------|---|---|---|----|----|----|------|------|------|------|------|---|
| 168 | TBG-2 TTTT         | 1 | 0 | 4 | 6  | 5  | 15 | 0.00 | 0.27 | 0.40 | 0.33 | 1.00 | 1 |
| 184 | TBG-2 TTTT         | 1 | 1 | 4 | 6  | 5  | 16 | 0.06 | 0.25 | 0.38 | 0.31 | 1.06 | 1 |
| 216 | TBG-2 TTTT         | 1 | 3 | 0 | 3  | 3  | 9  | 0.33 | 0.00 | 0.33 | 0.33 | 1.33 | 1 |
| 251 | TBG-2 TTTT         | 1 | 0 | 2 | 6  | 4  | 12 | 0.00 | 0.17 | 0.50 | 0.33 | 1.00 | 0 |
| 276 | TBG-2 TTTT         | 1 | 2 | 2 | 5  | 7  | 16 | 0.13 | 0.13 | 0.31 | 0.44 | 1.13 | 0 |
| 277 | TBG-2 TTTT         | 1 | 1 | 2 | 8  | 3  | 14 | 0.07 | 0.14 | 0.57 | 0.21 | 1.07 | 1 |
| 306 | TBG-2 TTTT         | 1 | 2 | 0 | 5  | 6  | 13 | 0.15 | 0.00 | 0.38 | 0.46 | 1.15 | 0 |
| 310 | TBG-2 TTTT         | 1 | 0 | 1 | 7  | 6  | 14 | 0.00 | 0.07 | 0.50 | 0.43 | 1.00 | 0 |
| 327 | TBG-2 TTTT         | 1 | 0 | 0 | 2  | 6  | 8  | 0.00 | 0.00 | 0.25 | 0.75 | 1.00 | 1 |
| 329 | TBG-2 TTTT         | 1 | 2 | 3 | 4  | 4  | 13 | 0.15 | 0.23 | 0.31 | 0.31 | 1.15 | 0 |
| 7   | TBG-4 TTTT         | 1 | 3 | 1 | 9  | 2  | 15 | 0.20 | 0.07 | 0.60 | 0.13 | 1.20 | 0 |
| 8   | TBG-4 TTTT         | 1 | 5 | 5 | 4  | 2  | 16 | 0.31 | 0.31 | 0.25 | 0.13 | 1.31 | 0 |
| 12  | TBG-4 TTTT         | 1 | 3 | 7 | 3  | 2  | 15 | 0.20 | 0.47 | 0.20 | 0.13 | 1.20 | 0 |
| 19  | TBG-4 TTTT         | 1 | 2 | 2 | 5  | 4  | 13 | 0.15 | 0.15 | 0.38 | 0.31 | 1.15 | 1 |
| 23  | TBG-4 TTTT         | 1 | 2 | 5 | 6  | 3  | 16 | 0.13 | 0.31 | 0.38 | 0.19 | 1.13 | 0 |
| 75  | TBG-4 TTTT         | 1 | 2 | 4 | 5  | 2  | 13 | 0.15 | 0.31 | 0.38 | 0.15 | 1.15 | 1 |
| 88  | TBG-4 TTTT         | 1 | 1 | 3 | 5  | 3  | 12 | 0.08 | 0.25 | 0.42 | 0.25 | 1.08 | 0 |
| 108 | TBG-4 TTTT         | 1 | 0 | 3 | 6  | 4  | 13 | 0.00 | 0.23 | 0.46 | 0.31 | 1.00 | 0 |
| 142 | TBG-4 TTTT         | 1 | 3 | 3 | 3  | 7  | 16 | 0.19 | 0.19 | 0.19 | 0.44 | 1.19 | 0 |
| 176 | TBG-4 TTTT         | 1 | 1 | 7 | 3  | 4  | 15 | 0.07 | 0.47 | 0.20 | 0.27 | 1.07 | 0 |
| 188 | TBG-4 TTTT         | 1 | 0 | 5 | 6  | 2  | 13 | 0.00 | 0.38 | 0.46 | 0.15 | 1.00 | 1 |
| 191 | TBG-4 TTTT         | 1 | 2 | 3 | 5  | 5  | 15 | 0.13 | 0.20 | 0.33 | 0.33 | 1.13 | 0 |
| 202 | TBG-4 TTTT         | 1 | 0 | 6 | 5  | 5  | 16 | 0.00 | 0.38 | 0.31 | 0.31 | 1.00 | 0 |
| 203 | TBG-4 TTTT         | 1 | 0 | 4 | 5  | 0  | 9  | 0.00 | 0.44 | 0.56 | 0.00 | 1.00 | 1 |
| 208 | TBG-4 TTTT         | 1 | 3 | 1 | 5  | 1  | 10 | 0.30 | 0.10 | 0.50 | 0.10 | 1.30 | 1 |
| 211 | TBG-4 TTTT         | 1 | 0 | 2 | 13 | 0  | 15 | 0.00 | 0.13 | 0.87 | 0.00 | 1.00 | 0 |
| 235 | TBG-4 TTTT         | 1 | 1 | 5 | 0  | 3  | 9  | 0.11 | 0.56 | 0.00 | 0.33 | 1.11 | 1 |
| 248 | TBG-4 TTTT         | 1 | 1 | 5 | 4  | 6  | 16 | 0.06 | 0.31 | 0.25 | 0.38 | 1.06 | 0 |
| 269 | TBG-4 TTTT         | 1 | 0 | 3 | 10 | 1  | 14 | 0.00 | 0.21 | 0.71 | 0.07 | 1.00 | 0 |
| 305 | TBG-4 TTTT         | 1 | 0 | 5 | 5  | 4  | 14 | 0.00 | 0.36 | 0.36 | 0.29 | 1.00 | 0 |
| 317 | TBG-4 TTTT         | 1 | 1 | 3 | 7  | 1  | 12 | 0.08 | 0.25 | 0.58 | 0.08 | 1.08 | 0 |
| 323 | TBG-4 TTTT         | 1 | 2 | 3 | 8  | 3  | 16 | 0.13 | 0.19 | 0.50 | 0.19 | 1.13 | 0 |
| 332 | TBG-4 TTTT         | 1 | 4 | 4 | 3  | 2  | 13 | 0.31 | 0.31 | 0.23 | 0.15 | 1.31 | 0 |
| 333 | TBG-4 TTTT         | 1 | 2 | 3 | 3  | 7  | 15 | 0.13 | 0.20 | 0.20 | 0.47 | 1.13 | 0 |
| 344 | TBG-4 TTTT         | 1 | 3 | 6 | 6  | 1  | 16 | 0.19 | 0.38 | 0.38 | 0.06 | 1.19 | 0 |
| 14  | TBG6A.1 7x8-3 TTTT | 2 | 2 | 4 | 6  | 4  | 16 | 0.13 | 0.25 | 0.38 | 0.25 | 1.13 | 1 |
| 42  | TBG6A.1 7x8-3 TTTT | 2 | 2 | 0 | 2  | 5  | 9  | 0.22 | 0.00 | 0.22 | 0.56 | 1.22 | 1 |
| 72  | TBG6A.1 7x8-3 TTTT | 2 | 1 | 3 | 3  | 5  | 12 | 0.08 | 0.25 | 0.25 | 0.42 | 1.08 | 0 |
| 89  | TBG6A.1 7x8-3 TTTT | 2 | 0 | 2 | 3  | 11 | 16 | 0.00 | 0.13 | 0.19 | 0.69 | 1.00 | 0 |
| 97  | TBG6A.1 7x8-3 TTTT | 2 | 4 | 3 | 2  | 7  | 16 | 0.25 | 0.19 | 0.13 | 0.44 | 1.25 | 0 |
| 104 | TBG6A.1 7x8-3 TTTT | 2 | 5 | 2 | 3  | 4  | 14 | 0.36 | 0.14 | 0.21 | 0.29 | 1.36 | 1 |
| 123 | TBG6A.1 7x8-3 TTTT | 2 | 4 | 2 | 4  | 3  | 13 | 0.31 | 0.15 | 0.31 | 0.23 | 1.31 | 1 |
| 147 | TBG6A.1 7x8-3 TTTT | 2 | 2 | 3 | 5  | 4  | 14 | 0.14 | 0.21 | 0.36 | 0.29 | 1.14 | 0 |

|     |                    |   |   |   |    |    |    |      |      |      |      |      |   |
|-----|--------------------|---|---|---|----|----|----|------|------|------|------|------|---|
| 154 | TBG6A.1 7x8-3 TTTT | 2 | 2 | 2 | 5  | 6  | 15 | 0.13 | 0.13 | 0.33 | 0.40 | 1.13 | 0 |
| 162 | TBG6A.1 7x8-3 TTTT | 2 | 3 | 5 | 4  | 4  | 16 | 0.19 | 0.31 | 0.25 | 0.25 | 1.19 | 0 |
| 163 | TBG6A.1 7x8-3 TTTT | 2 | 0 | 1 | 6  | 7  | 14 | 0.00 | 0.07 | 0.43 | 0.50 | 1.00 | 1 |
| 181 | TBG6A.1 7x8-3 TTTT | 2 | 2 | 0 | 2  | 11 | 15 | 0.13 | 0.00 | 0.13 | 0.73 | 1.13 | 0 |
| 184 | TBG6A.1 7x8-3 TTTT | 2 | 4 | 1 | 5  | 5  | 15 | 0.27 | 0.07 | 0.33 | 0.33 | 1.27 | 0 |
| 187 | TBG6A.1 7x8-3 TTTT | 2 | 1 | 4 | 4  | 3  | 12 | 0.08 | 0.33 | 0.33 | 0.25 | 1.08 | 0 |
| 194 | TBG6A.1 7x8-3 TTTT | 2 | 0 | 6 | 8  | 1  | 15 | 0.00 | 0.40 | 0.53 | 0.07 | 1.00 | 0 |
| 196 | TBG6A.1 7x8-3 TTTT | 2 | 3 | 3 | 5  | 5  | 16 | 0.19 | 0.19 | 0.31 | 0.31 | 1.19 | 0 |
| 197 | TBG6A.1 7x8-3 TTTT | 2 | 3 | 1 | 4  | 4  | 12 | 0.25 | 0.08 | 0.33 | 0.33 | 1.25 | 0 |
| 200 | TBG6A.1 7x8-3 TTTT | 2 | 4 | 2 | 2  | 6  | 14 | 0.29 | 0.14 | 0.14 | 0.43 | 1.29 | 0 |
| 203 | TBG6A.1 7x8-3 TTTT | 2 | 0 | 3 | 4  | 4  | 11 | 0.00 | 0.27 | 0.36 | 0.36 | 1.00 | 1 |
| 214 | TBG6A.1 7x8-3 TTTT | 2 | 3 | 5 | 4  | 3  | 15 | 0.20 | 0.33 | 0.27 | 0.20 | 1.20 | 0 |
| 226 | TBG6A.1 7x8-3 TTTT | 2 | 3 | 2 | 7  | 2  | 14 | 0.21 | 0.14 | 0.50 | 0.14 | 1.21 | 0 |
| 228 | TBG6A.1 7x8-3 TTTT | 2 | 0 | 0 | 11 | 3  | 14 | 0.00 | 0.00 | 0.79 | 0.21 | 1.00 | 0 |
| 262 | TBG6A.1 7x8-3 TTTT | 2 | 2 | 3 | 5  | 2  | 12 | 0.17 | 0.25 | 0.42 | 0.17 | 1.17 | 0 |
| 294 | TBG6A.1 7x8-3 TTTT | 2 | 2 | 1 | 5  | 4  | 12 | 0.17 | 0.08 | 0.42 | 0.33 | 1.17 | 0 |
| 295 | TBG6A.1 7x8-3 TTTT | 2 | 1 | 4 | 6  | 2  | 13 | 0.08 | 0.31 | 0.46 | 0.15 | 1.08 | 0 |
| 3   | TBG6A.1 7x8-7 TTTT | 2 | 4 | 2 | 0  | 7  | 13 | 0.31 | 0.15 | 0.00 | 0.54 | 1.31 | 0 |
| 8   | TBG6A.1 7x8-7 TTTT | 2 | 1 | 2 | 4  | 6  | 13 | 0.08 | 0.15 | 0.31 | 0.46 | 1.08 | 1 |
| 10  | TBG6A.1 7x8-7 TTTT | 2 | 1 | 3 | 4  | 5  | 13 | 0.08 | 0.23 | 0.31 | 0.38 | 1.08 | 0 |
| 21  | TBG6A.1 7x8-7 TTTT | 2 | 0 | 8 | 2  | 2  | 12 | 0.00 | 0.67 | 0.17 | 0.17 | 1.00 | 0 |
| 34  | TBG6A.1 7x8-7 TTTT | 2 | 4 | 6 | 2  | 4  | 16 | 0.25 | 0.38 | 0.13 | 0.25 | 1.25 | 0 |
| 37  | TBG6A.1 7x8-7 TTTT | 2 | 2 | 2 | 5  | 6  | 15 | 0.13 | 0.13 | 0.33 | 0.40 | 1.13 | 0 |
| 75  | TBG6A.1 7x8-7 TTTT | 2 | 1 | 1 | 2  | 4  | 8  | 0.13 | 0.13 | 0.25 | 0.50 | 1.13 | 1 |
| 77  | TBG6A.1 7x8-7 TTTT | 2 | 0 | 6 | 4  | 4  | 14 | 0.00 | 0.43 | 0.29 | 0.29 | 1.00 | 1 |
| 93  | TBG6A.1 7x8-7 TTTT | 2 | 1 | 2 | 5  | 3  | 11 | 0.09 | 0.18 | 0.45 | 0.27 | 1.09 | 1 |
| 114 | TBG6A.1 7x8-7 TTTT | 2 | 0 | 3 | 9  | 4  | 16 | 0.00 | 0.19 | 0.56 | 0.25 | 1.00 | 0 |
| 115 | TBG6A.1 7x8-7 TTTT | 2 | 3 | 4 | 6  | 2  | 15 | 0.20 | 0.27 | 0.40 | 0.13 | 1.20 | 0 |
| 117 | TBG6A.1 7x8-7 TTTT | 2 | 2 | 1 | 4  | 7  | 14 | 0.14 | 0.07 | 0.29 | 0.50 | 1.14 | 1 |
| 119 | TBG6A.1 7x8-7 TTTT | 2 | 0 | 3 | 6  | 4  | 13 | 0.00 | 0.23 | 0.46 | 0.31 | 1.00 | 0 |
| 125 | TBG6A.1 7x8-7 TTTT | 2 | 2 | 4 | 5  | 5  | 16 | 0.13 | 0.25 | 0.31 | 0.31 | 1.13 | 0 |
| 126 | TBG6A.1 7x8-7 TTTT | 2 | 2 | 3 | 3  | 4  | 12 | 0.17 | 0.25 | 0.25 | 0.33 | 1.17 | 1 |
| 156 | TBG6A.1 7x8-7 TTTT | 2 | 0 | 4 | 3  | 5  | 12 | 0.00 | 0.33 | 0.25 | 0.42 | 1.00 | 1 |
| 174 | TBG6A.1 7x8-7 TTTT | 2 | 1 | 4 | 8  | 1  | 14 | 0.07 | 0.29 | 0.57 | 0.07 | 1.07 | 1 |
| 190 | TBG6A.1 7x8-7 TTTT | 2 | 2 | 3 | 5  | 3  | 13 | 0.15 | 0.23 | 0.38 | 0.23 | 1.15 | 0 |
| 198 | TBG6A.1 7x8-7 TTTT | 2 | 0 | 0 | 7  | 7  | 14 | 0.00 | 0.00 | 0.50 | 0.50 | 1.00 | 1 |
| 209 | TBG6A.1 7x8-7 TTTT | 2 | 1 | 4 | 6  | 3  | 14 | 0.07 | 0.29 | 0.43 | 0.21 | 1.07 | 1 |
| 219 | TBG6A.1 7x8-7 TTTT | 2 | 3 | 4 | 4  | 1  | 12 | 0.25 | 0.33 | 0.33 | 0.08 | 1.25 | 1 |
| 241 | TBG6A.1 7x8-7 TTTT | 2 | 0 | 4 | 7  | 2  | 13 | 0.00 | 0.31 | 0.54 | 0.15 | 1.00 | 1 |
| 261 | TBG6A.1 7x8-7 TTTT | 2 | 0 | 3 | 9  | 4  | 16 | 0.00 | 0.19 | 0.56 | 0.25 | 1.00 | 0 |
| 282 | TBG6A.1 7x8-7 TTTT | 2 | 1 | 2 | 6  | 4  | 13 | 0.08 | 0.15 | 0.46 | 0.31 | 1.08 | 0 |
| 293 | TBG6A.1 7x8-7 TTTT | 2 | 3 | 2 | 8  | 2  | 15 | 0.20 | 0.13 | 0.53 | 0.13 | 1.20 | 0 |
| 9   | TxD                | 1 | 2 | 1 | 3  | 7  | 13 | 0.15 | 0.08 | 0.23 | 0.54 | 1.15 |   |

|     |                  |   |   |   |    |   |    |      |      |      |      |      |   |
|-----|------------------|---|---|---|----|---|----|------|------|------|------|------|---|
| 10  | TxD              | 1 | 2 | 3 | 4  | 4 | 13 | 0.15 | 0.23 | 0.31 | 0.31 | 1.15 |   |
| 13  | TxD              | 1 | 0 | 3 | 9  | 3 | 15 | 0.00 | 0.20 | 0.60 | 0.20 | 1.00 |   |
| 14  | TxD              | 1 | 3 | 5 | 2  | 6 | 16 | 0.19 | 0.31 | 0.13 | 0.38 | 1.19 |   |
| 19  | TxD              | 1 | 3 | 3 | 5  | 2 | 13 | 0.23 | 0.23 | 0.38 | 0.15 | 1.23 |   |
| 23  | TxD              | 1 | 0 | 4 | 6  | 3 | 13 | 0.00 | 0.31 | 0.46 | 0.23 | 1.00 |   |
| 28  | TxD              | 1 | 3 | 5 | 4  | 2 | 14 | 0.21 | 0.36 | 0.29 | 0.14 | 1.21 |   |
| 30  | TxD              | 1 | 1 | 5 | 4  | 3 | 13 | 0.08 | 0.38 | 0.31 | 0.23 | 1.08 |   |
| 33  | TxD              | 1 | 1 | 5 | 6  | 2 | 14 | 0.07 | 0.36 | 0.43 | 0.14 | 1.07 |   |
| 38  | TxD              | 1 | 3 | 1 | 5  | 4 | 13 | 0.23 | 0.08 | 0.38 | 0.31 | 1.23 |   |
| 43  | TxD              | 1 | 2 | 3 | 3  | 5 | 13 | 0.15 | 0.23 | 0.23 | 0.38 | 1.15 |   |
| 46  | TxD              | 1 | 0 | 4 | 5  | 1 | 10 | 0.00 | 0.40 | 0.50 | 0.10 | 1.00 |   |
| 48  | TxD              | 1 | 1 | 4 | 4  | 1 | 10 | 0.10 | 0.40 | 0.40 | 0.10 | 1.10 |   |
| 53  | TxD              | 1 | 0 | 5 | 9  | 1 | 15 | 0.00 | 0.33 | 0.60 | 0.07 | 1.00 |   |
| 56  | TxD              | 1 | 1 | 1 | 6  | 6 | 14 | 0.07 | 0.07 | 0.43 | 0.43 | 1.07 |   |
| 57  | TxD              | 1 | 0 | 7 | 1  | 3 | 11 | 0.00 | 0.64 | 0.09 | 0.27 | 1.00 |   |
| 69  | TxD              | 1 | 1 | 2 | 4  | 7 | 14 | 0.07 | 0.14 | 0.29 | 0.50 | 1.07 |   |
| 71  | TxD              | 1 | 2 | 3 | 4  | 5 | 14 | 0.14 | 0.21 | 0.29 | 0.36 | 1.14 |   |
| 74  | TxD              | 1 | 0 | 4 | 10 | 2 | 16 | 0.00 | 0.25 | 0.63 | 0.13 | 1.00 |   |
| 75  | TxD              | 1 | 1 | 4 | 7  | 3 | 15 | 0.07 | 0.27 | 0.47 | 0.20 | 1.07 |   |
| 77  | TxD              | 1 | 1 | 7 | 6  | 1 | 15 | 0.07 | 0.47 | 0.40 | 0.07 | 1.07 |   |
| 83  | TxD              | 1 | 1 | 8 | 4  | 3 | 16 | 0.06 | 0.50 | 0.25 | 0.19 | 1.06 |   |
| 105 | TxD              | 1 | 2 | 3 | 6  | 3 | 14 | 0.14 | 0.21 | 0.43 | 0.21 | 1.14 |   |
| 110 | TxD              | 1 | 0 | 5 | 4  | 4 | 13 | 0.00 | 0.38 | 0.31 | 0.31 | 1.00 |   |
| 112 | TxD              | 1 | 0 | 3 | 7  | 4 | 14 | 0.00 | 0.21 | 0.50 | 0.29 | 1.00 |   |
| 5   | TBG.5Bx3B_2 DDDD | 1 | 2 | 2 | 3  | 3 | 10 | 0.20 | 0.20 | 0.30 | 0.30 | 1.20 | 0 |
| 11  | TBG.5Bx3B_2 DDDD | 1 | 0 | 5 | 3  | 5 | 13 | 0.00 | 0.38 | 0.23 | 0.38 | 1.00 | 1 |
| 13  | TBG.5Bx3B_2 DDDD | 1 | 0 | 5 | 8  | 2 | 15 | 0.00 | 0.33 | 0.53 | 0.13 | 1.00 | 1 |
| 24  | TBG.5Bx3B_2 DDDD | 1 | 1 | 6 | 4  | 4 | 15 | 0.07 | 0.40 | 0.27 | 0.27 | 1.07 | 1 |
| 27  | TBG.5Bx3B_2 DDDD | 1 | 0 | 4 | 5  | 3 | 12 | 0.00 | 0.33 | 0.42 | 0.25 | 1.00 | 0 |
| 30  | TBG.5Bx3B_2 DDDD | 1 | 1 | 4 | 6  | 2 | 13 | 0.08 | 0.31 | 0.46 | 0.15 | 1.08 | 0 |
| 37  | TBG.5Bx3B_2 DDDD | 1 | 1 | 3 | 7  | 3 | 14 | 0.07 | 0.21 | 0.50 | 0.21 | 1.07 | 1 |
| 49  | TBG.5Bx3B_2 DDDD | 1 | 0 | 4 | 8  | 4 | 16 | 0.00 | 0.25 | 0.50 | 0.25 | 1.00 | 1 |
| 53  | TBG.5Bx3B_2 DDDD | 1 | 0 | 1 | 7  | 1 | 9  | 0.00 | 0.11 | 0.78 | 0.11 | 1.00 | 1 |
| 65  | TBG.5Bx3B_2 DDDD | 1 | 0 | 9 | 3  | 1 | 13 | 0.00 | 0.69 | 0.23 | 0.08 | 1.00 | 1 |
| 74  | TBG.5Bx3B_2 DDDD | 1 | 1 | 8 | 3  | 3 | 15 | 0.07 | 0.53 | 0.20 | 0.20 | 1.07 | 1 |
| 79  | TBG.5Bx3B_2 DDDD | 1 | 2 | 5 | 4  | 0 | 11 | 0.18 | 0.45 | 0.36 | 0.00 | 1.18 | 1 |
| 91  | TBG.5Bx3B_2 DDDD | 1 | 1 | 8 | 5  | 2 | 16 | 0.06 | 0.50 | 0.31 | 0.13 | 1.06 | 1 |
| 133 | TBG.5Bx3B_2 DDDD | 1 | 0 | 3 | 1  | 6 | 10 | 0.00 | 0.30 | 0.10 | 0.60 | 1.00 | 0 |
| 164 | TBG.5Bx3B_2 DDDD | 1 | 0 | 7 | 3  | 3 | 13 | 0.00 | 0.54 | 0.23 | 0.23 | 1.00 | 1 |
| 167 | TBG.5Bx3B_2 DDDD | 1 | 2 | 3 | 5  | 4 | 14 | 0.14 | 0.21 | 0.36 | 0.29 | 1.14 | 1 |
| 171 | TBG.5Bx3B_2 DDDD | 1 | 0 | 4 | 5  | 1 | 10 | 0.00 | 0.40 | 0.50 | 0.10 | 1.00 | 0 |
| 180 | TBG.5Bx3B_2 DDDD | 1 | 3 | 5 | 5  | 2 | 15 | 0.20 | 0.33 | 0.33 | 0.13 | 1.20 | 0 |
| 194 | TBG.5Bx3B_2 DDDD | 1 | 1 | 4 | 5  | 4 | 14 | 0.07 | 0.29 | 0.36 | 0.29 | 1.07 | 0 |

|     |                  |   |   |   |    |   |    |      |      |      |      |      |   |
|-----|------------------|---|---|---|----|---|----|------|------|------|------|------|---|
| 205 | TBG.5Bx3B_2 DDDD | 1 | 2 | 2 | 3  | 9 | 16 | 0.13 | 0.13 | 0.19 | 0.56 | 1.13 | 0 |
| 226 | TBG.5Bx3B_2 DDDD | 1 | 0 | 2 | 6  | 5 | 13 | 0.00 | 0.15 | 0.46 | 0.38 | 1.00 | 1 |
| 244 | TBG.5Bx3B_2 DDDD | 1 | 3 | 3 | 5  | 3 | 14 | 0.21 | 0.21 | 0.36 | 0.21 | 1.21 | 1 |
| 263 | TBG.5Bx3B_2 DDDD | 1 | 1 | 4 | 3  | 3 | 11 | 0.09 | 0.36 | 0.27 | 0.27 | 1.09 | 1 |
| 336 | TBG.5Bx3B_2 DDDD | 1 | 0 | 7 | 6  | 1 | 14 | 0.00 | 0.50 | 0.43 | 0.07 | 1.00 | 0 |
| 342 | TBG.5Bx3B_2 DDDD | 1 | 0 | 4 | 7  | 1 | 12 | 0.00 | 0.33 | 0.58 | 0.08 | 1.00 | 0 |
| 10  | TBG.5Bx3B_4 DDDD | 1 | 2 | 9 | 4  | 0 | 15 | 0.13 | 0.60 | 0.27 | 0.00 | 1.13 | 0 |
| 40  | TBG.5Bx3B_4 DDDD | 1 | 1 | 3 | 8  | 0 | 12 | 0.08 | 0.25 | 0.67 | 0.00 | 1.08 | 1 |
| 56  | TBG.5Bx3B_4 DDDD | 1 | 1 | 4 | 4  | 6 | 15 | 0.07 | 0.27 | 0.27 | 0.40 | 1.07 | 0 |
| 59  | TBG.5Bx3B_4 DDDD | 1 | 0 | 6 | 3  | 0 | 9  | 0.00 | 0.67 | 0.33 | 0.00 | 1.00 | 0 |
| 63  | TBG.5Bx3B_4 DDDD | 1 | 0 | 5 | 4  | 3 | 12 | 0.00 | 0.42 | 0.33 | 0.25 | 1.00 | 0 |
| 72  | TBG.5Bx3B_4 DDDD | 1 | 1 | 7 | 1  | 0 | 9  | 0.11 | 0.78 | 0.11 | 0.00 | 1.11 | 1 |
| 105 | TBG.5Bx3B_4 DDDD | 1 | 1 | 4 | 4  | 2 | 11 | 0.09 | 0.36 | 0.36 | 0.18 | 1.09 | 0 |
| 130 | TBG.5Bx3B_4 DDDD | 1 | 2 | 1 | 6  | 1 | 10 | 0.20 | 0.10 | 0.60 | 0.10 | 1.20 | 1 |
| 175 | TBG.5Bx3B_4 DDDD | 1 | 0 | 4 | 8  | 4 | 16 | 0.00 | 0.25 | 0.50 | 0.25 | 1.00 | 0 |
| 247 | TBG.5Bx3B_4 DDDD | 1 | 1 | 5 | 5  | 2 | 13 | 0.08 | 0.38 | 0.38 | 0.15 | 1.08 | 0 |
| 287 | TBG.5Bx3B_4 DDDD | 1 | 2 | 2 | 0  | 0 | 4  | 0.50 | 0.50 | 0.00 | 0.00 | 1.50 | 1 |
| 292 | TBG.5Bx3B_4 DDDD | 1 | 1 | 5 | 3  | 3 | 12 | 0.08 | 0.42 | 0.25 | 0.25 | 1.08 | 1 |
| 304 | TBG.5Bx3B_4 DDDD | 1 | 2 | 6 | 4  | 3 | 15 | 0.13 | 0.40 | 0.27 | 0.20 | 1.13 | 0 |
| 4   | TBG.5Bx3B_6 DDDD | 1 | 2 | 5 | 5  | 2 | 14 | 0.14 | 0.36 | 0.36 | 0.14 | 1.14 | 0 |
| 6   | TBG.5Bx3B_6 DDDD | 1 | 2 | 2 | 11 | 2 | 17 | 0.12 | 0.12 | 0.65 | 0.12 | 1.12 | 1 |
| 68  | TBG.5Bx3B_6 DDDD | 1 | 0 | 4 | 5  | 3 | 12 | 0.00 | 0.33 | 0.42 | 0.25 | 1.00 | 0 |
| 80  | TBG.5Bx3B_6 DDDD | 1 | 3 | 3 | 4  | 2 | 12 | 0.25 | 0.25 | 0.33 | 0.17 | 1.25 | 0 |
| 81  | TBG.5Bx3B_6 DDDD | 1 | 2 | 4 | 3  | 3 | 12 | 0.17 | 0.33 | 0.25 | 0.25 | 1.17 | 0 |
| 92  | TBG.5Bx3B_6 DDDD | 1 | 1 | 2 | 6  | 3 | 12 | 0.08 | 0.17 | 0.50 | 0.25 | 1.08 | 0 |
| 94  | TBG.5Bx3B_6 DDDD | 1 | 1 | 5 | 1  | 8 | 15 | 0.07 | 0.33 | 0.07 | 0.53 | 1.07 | 0 |
| 102 | TBG.5Bx3B_6 DDDD | 1 | 1 | 8 | 5  | 0 | 14 | 0.07 | 0.57 | 0.36 | 0.00 | 1.07 | 0 |
| 104 | TBG.5Bx3B_6 DDDD | 1 | 2 | 1 | 8  | 5 | 16 | 0.13 | 0.06 | 0.50 | 0.31 | 1.13 | 0 |
| 111 | TBG.5Bx3B_6 DDDD | 1 | 1 | 7 | 2  | 4 | 14 | 0.07 | 0.50 | 0.14 | 0.29 | 1.07 | 1 |
| 156 | TBG.5Bx3B_6 DDDD | 1 | 1 | 4 | 2  | 3 | 10 | 0.10 | 0.40 | 0.20 | 0.30 | 1.10 | 0 |
| 159 | TBG.5Bx3B_6 DDDD | 1 | 1 | 6 | 3  | 2 | 12 | 0.08 | 0.50 | 0.25 | 0.17 | 1.08 | 0 |
| 163 | TBG.5Bx3B_6 DDDD | 1 | 1 | 9 | 2  | 1 | 13 | 0.08 | 0.69 | 0.15 | 0.08 | 1.08 | 1 |
| 190 | TBG.5Bx3B_6 DDDD | 1 | 1 | 4 | 7  | 2 | 14 | 0.07 | 0.29 | 0.50 | 0.14 | 1.07 | 0 |
| 197 | TBG.5Bx3B_6 DDDD | 1 | 0 | 2 | 8  | 2 | 12 | 0.00 | 0.17 | 0.67 | 0.17 | 1.00 | 1 |
| 200 | TBG.5Bx3B_6 DDDD | 1 | 1 | 1 | 8  | 3 | 13 | 0.08 | 0.08 | 0.62 | 0.23 | 1.08 | 1 |
| 201 | TBG.5Bx3B_6 DDDD | 1 | 1 | 6 | 5  | 2 | 14 | 0.07 | 0.43 | 0.36 | 0.14 | 1.07 | 0 |
| 213 | TBG.5Bx3B_6 DDDD | 1 | 1 | 4 | 5  | 1 | 11 | 0.09 | 0.36 | 0.45 | 0.09 | 1.09 | 1 |
| 256 | TBG.5Bx3B_6 DDDD | 1 | 0 | 6 | 7  | 3 | 16 | 0.00 | 0.38 | 0.44 | 0.19 | 1.00 | 0 |
| 257 | TBG.5Bx3B_6 DDDD | 1 | 1 | 6 | 6  | 1 | 14 | 0.07 | 0.43 | 0.43 | 0.07 | 1.07 | 1 |
| 270 | TBG.5Bx3B_6 DDDD | 1 | 1 | 5 | 6  | 4 | 16 | 0.06 | 0.31 | 0.38 | 0.25 | 1.06 | 0 |
| 295 | TBG.5Bx3B_6 DDDD | 1 | 0 | 2 | 4  | 4 | 10 | 0.00 | 0.20 | 0.40 | 0.40 | 1.00 | 1 |
| 303 | TBG.5Bx3B_6 DDDD | 1 | 0 | 7 | 6  | 2 | 15 | 0.00 | 0.47 | 0.40 | 0.13 | 1.00 | 0 |
| 309 | TBG.5Bx3B_6 DDDD | 1 | 1 | 3 | 7  | 1 | 12 | 0.08 | 0.25 | 0.58 | 0.08 | 1.08 | 1 |

|     |                  |   |   |   |    |   |    |      |      |      |      |      |   |
|-----|------------------|---|---|---|----|---|----|------|------|------|------|------|---|
| 325 | TBG.5Bx3B_6 DDDD | 1 | 1 | 6 | 7  | 2 | 16 | 0.06 | 0.38 | 0.44 | 0.13 | 1.06 | 0 |
| 29  | TBG5bx3b-11 DDDD | 2 | 1 | 6 | 3  | 4 | 14 | 0.07 | 0.43 | 0.21 | 0.29 | 1.07 | 0 |
| 49  | TBG5bx3b-11 DDDD | 2 | 0 | 2 | 6  | 5 | 13 | 0.00 | 0.15 | 0.46 | 0.38 | 1.00 | 1 |
| 112 | TBG5bx3b-11 DDDD | 2 | 0 | 2 | 4  | 5 | 11 | 0.00 | 0.18 | 0.36 | 0.45 | 1.00 | 1 |
| 150 | TBG5bx3b-11 DDDD | 2 | 1 | 3 | 6  | 3 | 13 | 0.08 | 0.23 | 0.46 | 0.23 | 1.08 | 1 |
| 161 | TBG5bx3b-11 DDDD | 2 | 2 | 5 | 7  | 1 | 15 | 0.13 | 0.33 | 0.47 | 0.07 | 1.13 | 0 |
| 207 | TBG5bx3b-11 DDDD | 2 | 1 | 3 | 5  | 2 | 11 | 0.09 | 0.27 | 0.45 | 0.18 | 1.09 | 1 |
| 263 | TBG5bx3b-11 DDDD | 2 | 1 | 2 | 3  | 1 | 7  | 0.14 | 0.29 | 0.43 | 0.14 | 1.14 | 1 |
| 269 | TBG5bx3b-11 DDDD | 2 | 1 | 2 | 7  | 5 | 15 | 0.07 | 0.13 | 0.47 | 0.33 | 1.07 | 0 |
| 1   | TBG 7x23_2 DDDD  | 2 | 2 | 4 | 5  | 4 | 15 | 0.13 | 0.27 | 0.33 | 0.27 | 1.13 | 0 |
| 2   | TBG 7x23_2 DDDD  | 2 | 0 | 5 | 5  | 4 | 14 | 0.00 | 0.36 | 0.36 | 0.29 | 1.00 | 1 |
| 55  | TBG 7x23_2 DDDD  | 2 |   | 3 | 9  | 1 | 13 | 0.00 | 0.23 | 0.69 | 0.08 | 1.00 | 0 |
| 57  | TBG 7x23_2 DDDD  | 2 | 2 | 3 | 5  | 5 | 15 | 0.13 | 0.20 | 0.33 | 0.33 | 1.13 | 1 |
| 65  | TBG 7x23_2 DDDD  | 2 | 0 | 4 | 5  | 2 | 11 | 0.00 | 0.36 | 0.45 | 0.18 | 1.00 | 1 |
| 82  | TBG 7x23_2 DDDD  | 2 | 1 | 4 | 6  | 3 | 14 | 0.07 | 0.29 | 0.43 | 0.21 | 1.07 | 1 |
| 88  | TBG 7x23_2 DDDD  | 2 | 0 | 7 | 2  | 7 | 16 | 0.00 | 0.44 | 0.13 | 0.44 | 1.00 | 1 |
| 108 | TBG 7x23_2 DDDD  | 2 | 2 | 3 | 6  | 1 | 12 | 0.17 | 0.25 | 0.50 | 0.08 | 1.17 | 0 |
| 116 | TBG 7x23_2 DDDD  | 2 | 0 | 4 | 4  | 4 | 12 | 0.00 | 0.33 | 0.33 | 0.33 | 1.00 | 0 |
| 138 | TBG 7x23_2 DDDD  | 2 | 0 | 6 | 7  | 2 | 15 | 0.00 | 0.40 | 0.47 | 0.13 | 1.00 | 1 |
| 168 | TBG 7x23_2 DDDD  | 2 | 0 | 3 | 9  | 1 | 13 | 0.00 | 0.23 | 0.69 | 0.08 | 1.00 | 1 |
| 173 | TBG 7x23_2 DDDD  | 2 | 2 | 2 | 9  | 1 | 14 | 0.14 | 0.14 | 0.64 | 0.07 | 1.14 | 1 |
| 177 | TBG 7x23_2 DDDD  | 2 | 0 | 3 | 11 | 2 | 16 | 0.00 | 0.19 | 0.69 | 0.13 | 1.00 | 0 |
| 189 | TBG 7x23_2 DDDD  | 2 | 0 | 5 | 9  | 2 | 16 | 0.00 | 0.31 | 0.56 | 0.13 | 1.00 | 0 |
| 192 | TBG 7x23_2 DDDD  | 2 | 2 | 2 | 9  | 3 | 16 | 0.13 | 0.13 | 0.56 | 0.19 | 1.13 | 0 |
| 220 | TBG 7x23_2 DDDD  | 2 | 1 | 4 | 5  | 1 | 11 | 0.09 | 0.36 | 0.45 | 0.09 | 1.09 | 1 |
| 221 | TBG 7x23_2 DDDD  | 2 | 1 | 4 | 8  | 1 | 14 | 0.07 | 0.29 | 0.57 | 0.07 | 1.07 | 1 |
| 225 | TBG 7x23_2 DDDD  | 2 | 2 | 3 | 8  | 3 | 16 | 0.13 | 0.19 | 0.50 | 0.19 | 1.13 | 0 |
| 229 | TBG 7x23_2 DDDD  | 2 | 1 | 4 | 8  | 0 | 13 | 0.08 | 0.31 | 0.62 | 0.00 | 1.08 | 0 |
| 255 | TBG 7x23_2 DDDD  | 2 | 0 | 1 | 10 | 2 | 13 | 0.00 | 0.08 | 0.77 | 0.15 | 1.00 | 1 |
| 256 | TBG 7x23_2 DDDD  | 2 | 2 | 2 | 8  | 2 | 14 | 0.14 | 0.14 | 0.57 | 0.14 | 1.14 | 0 |
| 259 | TBG 7x23_2 DDDD  | 2 | 0 | 6 | 4  | 3 | 13 | 0.00 | 0.46 | 0.31 | 0.23 | 1.00 | 1 |
| 266 | TBG 7x23_2 DDDD  | 2 | 1 | 3 | 7  | 0 | 11 | 0.09 | 0.27 | 0.64 | 0.00 | 1.09 | 0 |
| 280 | TBG 7x23_2 DDDD  | 2 | 0 | 1 | 11 | 3 | 15 | 0.00 | 0.07 | 0.73 | 0.20 | 1.00 | 0 |
| 290 | TBG 7x23_2 DDDD  | 2 | 2 | 1 | 3  | 6 | 12 | 0.17 | 0.08 | 0.25 | 0.50 | 1.17 | 1 |
| 5   | TBG 7x23_3 DDDD  | 2 | 0 | 3 | 5  | 3 | 11 | 0.00 | 0.27 | 0.45 | 0.27 | 1.00 | 1 |
| 19  | TBG 7x23_3 DDDD  | 2 | 1 | 1 | 7  | 6 | 15 | 0.07 | 0.07 | 0.47 | 0.40 | 1.07 | 1 |
| 25  | TBG 7x23_3 DDDD  | 2 | 0 | 2 | 7  | 1 | 10 | 0.00 | 0.20 | 0.70 | 0.10 | 1.00 | 0 |
| 26  | TBG 7x23_3 DDDD  | 2 | 1 | 7 | 3  | 2 | 13 | 0.08 | 0.54 | 0.23 | 0.15 | 1.08 | 0 |
| 38  | TBG 7x23_3 DDDD  | 2 | 1 | 6 | 6  | 3 | 16 | 0.06 | 0.38 | 0.38 | 0.19 | 1.06 | 1 |
| 54  | TBG 7x23_3 DDDD  | 2 | 1 | 4 | 4  | 3 | 12 | 0.08 | 0.33 | 0.33 | 0.25 | 1.08 | 1 |
| 60  | TBG 7x23_3 DDDD  | 2 | 0 | 3 | 6  | 5 | 14 | 0.00 | 0.21 | 0.43 | 0.36 | 1.00 | 1 |
| 69  | TBG 7x23_3 DDDD  | 2 | 0 | 5 | 6  | 1 | 12 | 0.00 | 0.42 | 0.50 | 0.08 | 1.00 | 1 |
| 94  | TBG 7x23_3 DDDD  | 2 | 0 | 6 | 6  | 1 | 13 | 0.00 | 0.46 | 0.46 | 0.08 | 1.00 | 0 |

|     |                 |   |   |   |    |   |    |      |      |      |      |      |   |
|-----|-----------------|---|---|---|----|---|----|------|------|------|------|------|---|
| 136 | TBG 7x23_3 DDDD | 2 | 1 | 5 | 6  | 3 | 15 | 0.07 | 0.33 | 0.40 | 0.20 | 1.07 | 0 |
| 159 | TBG 7x23_3 DDDD | 2 | 1 | 6 | 4  | 3 | 14 | 0.07 | 0.43 | 0.29 | 0.21 | 1.07 | 0 |
| 179 | TBG 7x23_3 DDDD | 2 | 0 | 4 | 9  | 1 | 14 | 0.00 | 0.29 | 0.64 | 0.07 | 1.00 | 0 |
| 188 | TBG 7x23_3 DDDD | 2 | 1 | 5 | 6  | 4 | 16 | 0.06 | 0.31 | 0.38 | 0.25 | 1.06 | 1 |
| 199 | TBG 7x23_3 DDDD | 2 | 2 | 9 | 3  | 2 | 16 | 0.13 | 0.56 | 0.19 | 0.13 | 1.13 | 0 |
| 205 | TBG 7x23_3 DDDD | 2 | 5 | 2 | 7  | 1 | 15 | 0.33 | 0.13 | 0.47 | 0.07 | 1.33 | 1 |
| 230 | TBG 7x23_3 DDDD | 2 | 1 | 3 | 3  | 2 | 9  | 0.11 | 0.33 | 0.33 | 0.22 | 1.11 | 0 |
| 231 | TBG 7x23_3 DDDD | 2 | 1 | 0 | 7  | 3 | 11 | 0.09 | 0.00 | 0.64 | 0.27 | 1.09 | 1 |
| 240 | TBG 7x23_3 DDDD | 2 | 0 | 6 | 6  | 3 | 15 | 0.00 | 0.40 | 0.40 | 0.20 | 1.00 | 1 |
| 253 | TBG 7x23_3 DDDD | 2 | 3 | 4 | 5  | 1 | 13 | 0.23 | 0.31 | 0.38 | 0.08 | 1.23 | 0 |
| 257 | TBG 7x23_3 DDDD | 2 | 1 | 4 | 8  | 2 | 15 | 0.07 | 0.27 | 0.53 | 0.13 | 1.07 | 0 |
| 258 | TBG 7x23_3 DDDD | 2 | 2 | 5 | 4  | 3 | 14 | 0.14 | 0.36 | 0.29 | 0.21 | 1.14 | 1 |
| 268 | TBG 7x23_3 DDDD | 2 | 0 | 3 | 10 | 1 | 14 | 0.00 | 0.21 | 0.71 | 0.07 | 1.00 | 0 |
| 276 | TBG 7x23_3 DDDD | 2 | 2 | 3 | 6  | 3 | 14 | 0.14 | 0.21 | 0.43 | 0.21 | 1.14 | 1 |
| 281 | TBG 7x23_3 DDDD | 2 | 1 | 4 | 9  | 1 | 15 | 0.07 | 0.27 | 0.60 | 0.07 | 1.07 | 0 |
| 289 | TBG 7x23_3 DDDD | 2 | 2 | 1 | 11 | 1 | 15 | 0.13 | 0.07 | 0.73 | 0.07 | 1.13 | 0 |
| 9   | TBG 7x23_4 DDDD | 2 | 1 | 4 | 5  | 3 | 13 | 0.08 | 0.31 | 0.38 | 0.23 | 1.08 | 1 |
| 12  | TBG 7x23_4 DDDD | 2 | 3 | 2 | 6  | 4 | 15 | 0.20 | 0.13 | 0.40 | 0.27 | 1.20 | 1 |
| 32  | TBG 7x23_4 DDDD | 2 | 0 | 2 | 2  | 5 | 9  | 0.00 | 0.22 | 0.22 | 0.56 | 1.00 | 0 |
| 35  | TBG 7x23_4 DDDD | 2 | 0 | 5 | 5  | 4 | 14 | 0.00 | 0.36 | 0.36 | 0.29 | 1.00 | 0 |
| 36  | TBG 7x23_4 DDDD | 2 | 0 | 3 | 10 | 2 | 15 | 0.00 | 0.20 | 0.67 | 0.13 | 1.00 | 1 |
| 45  | TBG 7x23_4 DDDD | 2 | 3 | 2 | 4  | 5 | 14 | 0.21 | 0.14 | 0.29 | 0.36 | 1.21 | 1 |
| 50  | TBG 7x23_4 DDDD | 2 | 1 | 3 | 6  | 2 | 12 | 0.08 | 0.25 | 0.50 | 0.17 | 1.08 | 0 |
| 62  | TBG 7x23_4 DDDD | 2 | 0 | 3 | 6  | 1 | 10 | 0.00 | 0.30 | 0.60 | 0.10 | 1.00 | 0 |
| 71  | TBG 7x23_4 DDDD | 2 | 1 | 2 | 10 | 1 | 14 | 0.07 | 0.14 | 0.71 | 0.07 | 1.07 | 0 |
| 86  | TBG 7x23_4 DDDD | 2 | 1 | 3 | 1  | 5 | 10 | 0.10 | 0.30 | 0.10 | 0.50 | 1.10 | 0 |
| 100 | TBG 7x23_4 DDDD | 2 | 1 | 0 | 5  | 7 | 13 | 0.08 | 0.00 | 0.38 | 0.54 | 1.08 | 0 |
| 129 | TBG 7x23_4 DDDD | 2 | 0 | 4 | 6  | 4 | 14 | 0.00 | 0.29 | 0.43 | 0.29 | 1.00 | 1 |
| 137 | TBG 7x23_4 DDDD | 2 | 0 | 4 | 7  | 5 | 16 | 0.00 | 0.25 | 0.44 | 0.31 | 1.00 | 0 |
| 145 | TBG 7x23_4 DDDD | 2 | 1 | 8 | 3  | 2 | 14 | 0.07 | 0.57 | 0.21 | 0.14 | 1.07 | 0 |
| 148 | TBG 7x23_4 DDDD | 2 | 2 | 2 | 6  | 5 | 15 | 0.13 | 0.13 | 0.40 | 0.33 | 1.13 | 1 |
| 149 | TBG 7x23_4 DDDD | 2 | 0 | 2 | 9  | 0 | 11 | 0.00 | 0.18 | 0.82 | 0.00 | 1.00 | 0 |
| 153 | TBG 7x23_4 DDDD | 2 | 2 | 6 | 6  | 1 | 15 | 0.13 | 0.40 | 0.40 | 0.07 | 1.13 | 0 |
| 158 | TBG 7x23_4 DDDD | 2 | 1 | 3 | 7  | 3 | 14 | 0.07 | 0.21 | 0.50 | 0.21 | 1.07 | 0 |
| 171 | TBG 7x23_4 DDDD | 2 | 1 | 5 | 6  | 2 | 14 | 0.07 | 0.36 | 0.43 | 0.14 | 1.07 | 0 |
| 175 | TBG 7x23_4 DDDD | 2 | 0 | 0 | 7  | 3 | 10 | 0.00 | 0.00 | 0.70 | 0.30 | 1.00 | 0 |
| 195 | TBG 7x23_4 DDDD | 2 | 0 | 3 | 7  | 5 | 15 | 0.00 | 0.20 | 0.47 | 0.33 | 1.00 | 1 |
| 211 | TBG 7x23_4 DDDD | 2 | 0 | 1 | 10 | 4 | 15 | 0.00 | 0.07 | 0.67 | 0.27 | 1.00 | 0 |
| 245 | TBG 7x23_4 DDDD | 2 | 1 | 4 | 5  | 3 | 13 | 0.08 | 0.31 | 0.38 | 0.23 | 1.08 | 1 |
| 271 | TBG 7x23_4 DDDD | 2 | 0 | 1 | 9  | 3 | 13 | 0.00 | 0.08 | 0.69 | 0.23 | 1.00 | 0 |
| 273 | TBG 7x23_4 DDDD | 2 | 1 | 3 | 8  | 1 | 13 | 0.08 | 0.23 | 0.62 | 0.08 | 1.08 | 0 |
| 11  | TBG 7x23_5 DDDD | 2 | 1 | 1 | 4  | 5 | 11 | 0.09 | 0.09 | 0.36 | 0.45 | 1.09 | 1 |
| 18  | TBG 7x23_5 DDDD | 2 | 0 | 9 | 2  | 3 | 14 | 0.00 | 0.64 | 0.14 | 0.21 | 1.00 | 1 |

|     |                 |   |   |   |    |   |    |      |      |      |      |      |   |
|-----|-----------------|---|---|---|----|---|----|------|------|------|------|------|---|
| 20  | TBG 7x23_5 DDDD | 2 | 1 | 2 | 7  | 2 | 12 | 0.08 | 0.17 | 0.58 | 0.17 | 1.08 | 0 |
| 31  | TBG 7x23_5 DDDD | 2 | 0 | 5 | 4  | 5 | 14 | 0.00 | 0.36 | 0.29 | 0.36 | 1.00 | 0 |
| 41  | TBG 7x23_5 DDDD | 2 | 2 | 6 | 2  | 4 | 14 | 0.14 | 0.43 | 0.14 | 0.29 | 1.14 | 1 |
| 52  | TBG 7x23_5 DDDD | 2 | 3 | 4 | 6  | 3 | 16 | 0.19 | 0.25 | 0.38 | 0.19 | 1.19 | 1 |
| 56  | TBG 7x23_5 DDDD | 2 | 2 | 3 | 5  | 1 | 11 | 0.18 | 0.27 | 0.45 | 0.09 | 1.18 | 0 |
| 58  | TBG 7x23_5 DDDD | 2 | 0 | 4 | 5  | 0 | 9  | 0.00 | 0.44 | 0.56 | 0.00 | 1.00 | 1 |
| 74  | TBG 7x23_5 DDDD | 2 | 4 | 4 | 4  | 2 | 14 | 0.29 | 0.29 | 0.29 | 0.14 | 1.29 | 0 |
| 92  | TBG 7x23_5 DDDD | 2 | 0 | 5 | 7  | 3 | 15 | 0.00 | 0.33 | 0.47 | 0.20 | 1.00 | 0 |
| 105 | TBG 7x23_5 DDDD | 2 | 0 | 4 | 8  | 3 | 15 | 0.00 | 0.27 | 0.53 | 0.20 | 1.00 | 0 |
| 109 | TBG 7x23_5 DDDD | 2 | 3 | 4 | 3  | 3 | 13 | 0.23 | 0.31 | 0.23 | 0.23 | 1.23 | 1 |
| 118 | TBG 7x23_5 DDDD | 2 | 0 | 6 | 7  | 2 | 15 | 0.00 | 0.40 | 0.47 | 0.13 | 1.00 | 0 |
| 121 | TBG 7x23_5 DDDD | 2 | 0 | 5 | 6  | 2 | 13 | 0.00 | 0.38 | 0.46 | 0.15 | 1.00 | 0 |
| 130 | TBG 7x23_5 DDDD | 2 | 2 | 3 | 4  | 3 | 12 | 0.17 | 0.25 | 0.33 | 0.25 | 1.17 | 0 |
| 133 | TBG 7x23_5 DDDD | 2 | 0 | 5 | 6  | 4 | 15 | 0.00 | 0.33 | 0.40 | 0.27 | 1.00 | 0 |
| 140 | TBG 7x23_5 DDDD | 2 | 2 | 3 | 8  | 1 | 14 | 0.14 | 0.21 | 0.57 | 0.07 | 1.14 | 0 |
| 144 | TBG 7x23_5 DDDD | 2 | 0 | 3 | 7  | 2 | 12 | 0.00 | 0.25 | 0.58 | 0.17 | 1.00 | 0 |
| 176 | TBG 7x23_5 DDDD | 2 | 1 | 4 | 5  | 2 | 12 | 0.08 | 0.33 | 0.42 | 0.17 | 1.08 | 0 |
| 204 | TBG 7x23_5 DDDD | 2 | 0 | 3 | 11 | 2 | 16 | 0.00 | 0.19 | 0.69 | 0.13 | 1.00 | 1 |
| 222 | TBG 7x23_5 DDDD | 2 | 0 | 5 | 9  | 2 | 16 | 0.00 | 0.31 | 0.56 | 0.13 | 1.00 | 1 |
| 227 | TBG 7x23_5 DDDD | 2 | 0 | 3 | 7  | 3 | 13 | 0.00 | 0.23 | 0.54 | 0.23 | 1.00 | 0 |
| 233 | TBG 7x23_5 DDDD | 2 | 1 | 5 | 6  | 1 | 13 | 0.08 | 0.38 | 0.46 | 0.08 | 1.08 | 0 |
| 292 | TBG 7x23_5 DDDD | 2 | 0 | 3 | 4  | 3 | 10 | 0.00 | 0.30 | 0.40 | 0.30 | 1.00 | 1 |
| 297 | TBG 7x23_5 DDDD | 2 | 0 | 6 | 9  | 0 | 15 | 0.00 | 0.40 | 0.60 | 0.00 | 1.00 | 0 |

**Table S1 notes:** Primary phenotyping of metaphase spreads from diploids and tetraploids segregating for *ASY1-D* and *ASY1-T*; tetraploids are pooled from two experiments that do not differ statistically (Chi-squared test, p-value = 0.27). Image numbers correspond to images provided under <https://doi.org/10.3929/ethz-b-000386103>. Genotype indicates individual name as well as genotype class. Exp = experiment number. Trait definitions as in Figure 2, with left columns giving raw numbers and right columns giving proportion of each shape among scorable bivalents. o = ring (2 crossover) bivalents; + = proportion bivalents with substantial central chromatin past the chiasma; | = proportion bivalents with very little central chromatin past the chiasma; † = bivalents intermediate between | and +. Ts = total scorable bivalents in each cell. Proportions of bivalents are given as a proportion of each type out of the total scorable bivalents. CO/Bv = crossover frequency per bivalent, calculated as:  $(2(O) + \text{sum}(l, †, +)) / Ts$ . Mv = multivalents assayed as presence (1) or absence (0).



**Table S2:** Chi-squared test results for bivalent shape comparisons of diploids, and tetraploids segregating D vs T alleles of ASY1

| <b>Comparison</b>                                        | <b>p-value</b>                     |
|----------------------------------------------------------|------------------------------------|
| All genotypes                                            | <b>2.20 x 10<sup>-16</sup></b>     |
| <b>Comparison</b>                                        | <b>Bonferroni adjusted p-value</b> |
| TTTT vs DDDD                                             | <b>3.67 x 10<sup>-07</sup></b>     |
| TTTT vs TxD                                              | <b>0.73</b>                        |
| TTTT vs Diploid (x2)                                     | <b>1.15 x 10<sup>-13</sup></b>     |
| DDDD vs TxD                                              | <b>0.69</b>                        |
| DDDD vs Diploid (x2)                                     | <b>1.83 x 10<sup>-09</sup></b>     |
| TxD vs Diploid (x2)                                      | <b>2.17 x 10<sup>-07</sup></b>     |
| <b>Fisher test result for multivalent presence rates</b> |                                    |
| <b>Comparison</b>                                        | <b>p-value</b>                     |
| TTTT vs DDDD                                             | <b>0.031</b>                       |

**Table S2 notes:** Results from post-hoc pairwise chi-squared tests with Bonferroni correction to determine if significant differences occurred between individual pairs of genotypes using bivalent count data from Table S1. For multivalent presence/absence data we used Fishers exact test comparing the DDDD and TTTT genotypes only.

**Table S3:** Estimated trait means (number per cell) of different bivalent shapes and p-values from GLMMs for ASY1 D vs T

| Rod                              |          |           |            |
|----------------------------------|----------|-----------|------------|
|                                  | Est mean | 2.5% Conf | 97.5% Conf |
| Diploid (x2) (1 plant, 25 cells) | 2.63     | 1.87      | 3.71       |
| DDDD (8 plants, 170 cells)       | 2.63     | 2.31      | 2.99       |
| TXD (1 plants, 25 cells)         | 3.39     | 2.45      | 4.68       |
| TTTT (4 plants, 100 cells)       | 4.21     | 3.6       | 4.91       |

| Rod p values |         |           |       |
|--------------|---------|-----------|-------|
|              | Dip(x2) | DDDD      | TXD   |
| Dip(x2)      |         |           |       |
| DDDD         | 0.9974  |           |       |
| TXD          | 0.2917  | 0.152     |       |
| TTTT         | 0.0143  | 0.0000044 | 0.236 |

| Cross                            |          |           |            |
|----------------------------------|----------|-----------|------------|
|                                  | Est mean | 2.5% Conf | 97.5% Conf |
| Diploid (x2) (1 plant, 25 cells) | 6.15     | 4.81      | 7.86       |
| DDDD (8 plants, 170 cells)       | 3.94     | 3.56      | 4.37       |
| TXD (1 plants, 25 cells)         | 3.91     | 2.98      | 5.14       |
| TTTT (4 plants, 100 cells)       | 3.02     | 2.61      | 3.5        |

| Cross p values |           |         |        |
|----------------|-----------|---------|--------|
|                | Dip(x2)   | DDDD    | TXD    |
| Dip(x2)        |           |         |        |
| DDDD           | 0.00106   |         |        |
| TXD            | 0.01568   | 0.95368 |        |
| TTTT           | 0.0000011 | 0.00346 | 0.1033 |

| Ring                             |          |           |            |
|----------------------------------|----------|-----------|------------|
|                                  | Est mean | 2.5% Conf | 97.5% Conf |
| Diploid (x2) (1 plant, 25 cells) | 2.56     | 1.97      | 3.32       |
| DDDD (8 plants, 170 cells)       | 0.92     | 0.79      | 1.08       |
| TXD (1 plants, 25 cells)         | 1.2      | 0.83      | 1.73       |
| TTTT (4 plants, 100 cells)       | 1.54     | 1.3       | 1.81       |

| Ring p values |          |           |         |
|---------------|----------|-----------|---------|
|               | Dip(x2)  | DDDD      | TXD     |
| Dip(x2)       |          |           |         |
| DDDD          | 7.33E-11 |           |         |
| TXD           | 0.00104  | 0.203     |         |
| TTTT          | 0.00127  | 0.0000128 | 0.22716 |

| Bowtie                           |          |           |            |
|----------------------------------|----------|-----------|------------|
|                                  | Est mean | 2.5% Conf | 97.5% Conf |
| Diploid (x2) (1 plant, 25 cells) | 3.19     | 2.46      | 4.14       |
| DDDD (8 plants, 170 cells)       | 5.66     | 5.21      | 6.14       |
| TXD (1 plants, 25 cells)         | 5.11     | 4.09      | 6.39       |
| TTTT (4 plants, 100 cells)       | 4.78     | 4.26      | 5.36       |

| Bowtie p values |           |        |         |
|-----------------|-----------|--------|---------|
|                 | Dip(x2)   | DDDD   | TXD     |
| Dip(x2)         |           |        |         |
| DDDD            | 0.0000411 |        |         |
| TXD             | 0.00721   | 0.4042 |         |
| TTTT            | 0.00545   | 0.0187 | 0.59911 |

| MV                         |          |           |            |
|----------------------------|----------|-----------|------------|
|                            | Est mean | 2.5% Conf | 97.5% Conf |
| DDDD (8 plants, 170 cells) | 0.491    | 0.409     | 0.574      |
| TTTT (4 plants, 100 cells) | 0.349    | 0.253     | 0.458      |

| Multivalent p value |        |
|---------------------|--------|
|                     | DDDD   |
| TTTT                | 0.0416 |

**Table S3 notes:** Trait means (left) and p-values (right) calculated from GLMM modeling. Normal approximations of 95% confidence intervals (range given from 2.5% Conf to 97.5% Conf) were calculated as 1.96 estimated standard errors.

**Table S4:** Cytological trait values for *A. arenosa* tetraploids segregating ASY1 and ASY3 – experiment 1

| Gen | Plant | Image | Proportions (out of total scorable bivalents) |   |    |   |    |      |      |      | CO/Bv | MV   |   |
|-----|-------|-------|-----------------------------------------------|---|----|---|----|------|------|------|-------|------|---|
|     |       |       | O                                             | + | †  | I | Ts | O    | +    | †    |       |      | I |
| DD  | 91    | 8     | 3                                             | 2 | 6  | 2 | 13 | 0.15 | 0.46 | 0.15 | 0.23  | 1.23 | 1 |
| DD  | 91    | 10    | 3                                             | 2 | 6  | 1 | 12 | 0.08 | 0.50 | 0.17 | 0.25  | 1.25 | 0 |
| DD  | 91    | 12    | 3                                             | 2 | 8  | 1 | 14 | 0.07 | 0.57 | 0.14 | 0.21  | 1.21 | 1 |
| DD  | 91    | 14    | 3                                             | 2 | 7  | 3 | 15 | 0.20 | 0.47 | 0.13 | 0.20  | 1.20 | 1 |
| DD  | 91    | 17    | 2                                             | 0 | 8  | 3 | 13 | 0.23 | 0.62 | 0.00 | 0.15  | 1.15 | 1 |
| DD  | 91    | 19    | 3                                             | 0 | 8  | 2 | 13 | 0.15 | 0.62 | 0.00 | 0.23  | 1.23 | 1 |
| DD  | 91    | 20    | 3                                             | 3 | 4  | 0 | 10 | 0.00 | 0.40 | 0.30 | 0.30  | 1.30 | 0 |
| DD  | 91    | 21    | 4                                             | 2 | 9  | 1 | 16 | 0.06 | 0.56 | 0.13 | 0.25  | 1.25 | 0 |
| DD  | 91    | 22    | 1                                             | 1 | 8  | 0 | 10 | 0.00 | 0.80 | 0.10 | 0.10  | 1.10 | 1 |
| DD  | 91    | 25    | 2                                             | 4 | 9  | 1 | 16 | 0.06 | 0.56 | 0.25 | 0.13  | 1.13 | 0 |
| DD  | 91    | 26    | 2                                             | 1 | 5  | 4 | 12 | 0.33 | 0.42 | 0.08 | 0.17  | 1.17 | 1 |
| DD  | 91    | 27    | 0                                             | 3 | 5  | 2 | 10 | 0.20 | 0.50 | 0.30 | 0.00  | 1.00 | 0 |
| DD  | 91    | 29    | 2                                             | 2 | 10 | 0 | 14 | 0.00 | 0.71 | 0.14 | 0.14  | 1.14 | 1 |
| DD  | 91    | 32    | 3                                             | 1 | 7  | 2 | 13 | 0.15 | 0.54 | 0.08 | 0.23  | 1.23 | 1 |
| DD  | 91    | 35    | 3                                             | 3 | 5  | 4 | 15 | 0.27 | 0.33 | 0.20 | 0.20  | 1.20 | 0 |
| DD  | 1T-14 | 1     | 2                                             | 0 | 6  | 2 | 10 | 0.20 | 0.60 | 0.00 | 0.20  | 1.20 | 0 |
| DD  | 1T-14 | 2     | 4                                             | 1 | 5  | 4 | 14 | 0.29 | 0.36 | 0.07 | 0.29  | 1.29 | 1 |
| DD  | 1T-14 | 3     | 3                                             | 1 | 4  | 2 | 10 | 0.20 | 0.40 | 0.10 | 0.30  | 1.30 | 1 |
| DD  | 1T-14 | 4     | 2                                             | 1 | 7  | 3 | 13 | 0.23 | 0.54 | 0.08 | 0.15  | 1.15 | 0 |
| DD  | 1T-14 | 5     | 3                                             | 1 | 4  | 2 | 10 | 0.20 | 0.40 | 0.10 | 0.30  | 1.30 | 0 |
| DD  | 1T-14 | 6     | 1                                             | 0 | 8  | 2 | 11 | 0.18 | 0.73 | 0.00 | 0.09  | 1.09 | 0 |
| DD  | 1T-14 | 8     | 5                                             | 3 | 3  | 2 | 13 | 0.15 | 0.23 | 0.23 | 0.38  | 1.38 | 0 |
| DD  | 1T-14 | 7     | 3                                             | 1 | 4  | 2 | 10 | 0.20 | 0.40 | 0.10 | 0.30  | 1.30 | 0 |
| DD  | 1T-37 | 9     | 2                                             | 2 | 8  | 3 | 15 | 0.20 | 0.53 | 0.13 | 0.13  | 1.13 | 0 |
| DD  | 1T-37 | 10    | 0                                             | 4 | 8  | 1 | 13 | 0.08 | 0.62 | 0.31 | 0.00  | 1.00 | 0 |
| DD  | 1T-37 | 12    | 1                                             | 1 | 7  | 1 | 10 | 0.10 | 0.70 | 0.10 | 0.10  | 1.10 | 0 |
| DD  | 1T-37 | 14    | 1                                             | 2 | 8  | 1 | 12 | 0.08 | 0.67 | 0.17 | 0.08  | 1.08 | 0 |
| DD  | 1T-37 | 22    | 2                                             | 1 | 8  | 4 | 15 | 0.27 | 0.53 | 0.07 | 0.13  | 1.13 | 0 |
| DD  | 1T-37 | 30    | 0                                             | 1 | 8  | 3 | 12 | 0.25 | 0.67 | 0.08 | 0.00  | 1.00 | 0 |
| DD  | 1T-37 | 32    | 2                                             | 0 | 9  | 2 | 13 | 0.15 | 0.69 | 0.00 | 0.15  | 1.15 | 1 |
| DD  | 1T-37 | 35    | 1                                             | 1 | 7  | 2 | 11 | 0.18 | 0.64 | 0.09 | 0.09  | 1.09 | 0 |
| DD  | 1T-37 | 36    | 2                                             | 1 | 5  | 4 | 12 | 0.33 | 0.42 | 0.08 | 0.17  | 1.17 | 0 |
| DD  | 1T-37 | 40    | 1                                             | 6 | 5  | 0 | 12 | 0.00 | 0.42 | 0.50 | 0.08  | 1.08 | 0 |
| DD  | 1T-37 | 47    | 6                                             | 2 | 6  | 1 | 15 | 0.07 | 0.40 | 0.13 | 0.40  | 1.40 | 1 |
| DD  | 1T-37 | 50    | 1                                             | 1 | 10 | 1 | 13 | 0.08 | 0.77 | 0.08 | 0.08  | 1.08 | 1 |
| DD  | 1T-37 | 54    | 3                                             | 1 | 5  | 4 | 13 | 0.31 | 0.38 | 0.08 | 0.23  | 1.23 | 1 |
| DD  | 1T-37 | 55    | 3                                             | 2 | 8  | 3 | 16 | 0.19 | 0.50 | 0.13 | 0.19  | 1.19 | 0 |
| DD  | 1T-37 | 56    | 1                                             | 3 | 5  | 2 | 11 | 0.18 | 0.45 | 0.27 | 0.09  | 1.09 | 1 |
| DT  | 34    | 1     | 3                                             | 0 | 5  | 4 | 12 | 0.33 | 0.42 | 0.00 | 0.25  | 1.25 | 1 |

|    |       |      |   |   |    |   |    |      |      |      |      |      |   |
|----|-------|------|---|---|----|---|----|------|------|------|------|------|---|
| DT | 34    | 9    | 2 | 0 | 10 | 1 | 13 | 0.08 | 0.77 | 0.00 | 0.15 | 1.15 | 1 |
| DT | 34    | 11   | 1 | 1 | 3  | 9 | 14 | 0.64 | 0.21 | 0.07 | 0.07 | 1.07 | 1 |
| DT | 34    | 13   | 5 | 1 | 6  | 3 | 15 | 0.20 | 0.40 | 0.07 | 0.33 | 1.33 | 0 |
| DT | 34    | 21   | 4 | 1 | 5  | 4 | 14 | 0.29 | 0.36 | 0.07 | 0.29 | 1.29 | 0 |
| DT | 34    | 25   | 3 | 0 | 7  | 1 | 11 | 0.09 | 0.64 | 0.00 | 0.27 | 1.27 | 1 |
| DT | 34    | 27   | 4 | 1 | 6  | 1 | 12 | 0.08 | 0.50 | 0.08 | 0.33 | 1.33 | 1 |
| DT | 34    | 33   | 1 | 1 | 8  | 3 | 13 | 0.23 | 0.62 | 0.08 | 0.08 | 1.08 | 1 |
| DT | 34    | 39   | 1 | 0 | 10 | 3 | 14 | 0.21 | 0.71 | 0.00 | 0.07 | 1.07 | 0 |
| DT | 34    | 40   | 6 | 1 | 5  | 2 | 14 | 0.14 | 0.36 | 0.07 | 0.43 | 1.43 | 0 |
| DT | 34    | 41   | 8 | 1 | 5  | 1 | 15 | 0.07 | 0.33 | 0.07 | 0.53 | 1.53 | 0 |
| DT | 34    | 42   | 3 | 0 | 7  | 6 | 16 | 0.38 | 0.44 | 0.00 | 0.19 | 1.19 | 1 |
| DT | 34    | 45   | 2 | 3 | 6  | 4 | 15 | 0.27 | 0.40 | 0.20 | 0.13 | 1.13 | 1 |
| DT | 34    | 48   | 3 | 1 | 7  | 1 | 12 | 0.08 | 0.58 | 0.08 | 0.25 | 1.25 | 0 |
| DT | 34    | 58   | 3 | 1 | 2  | 6 | 12 | 0.50 | 0.17 | 0.08 | 0.25 | 1.25 | 1 |
| DT | 1T-5  | 5    | 3 | 1 | 6  | 4 | 14 | 0.29 | 0.43 | 0.07 | 0.21 | 1.21 | 0 |
| DT | 1T-5  | 12   | 3 | 0 | 8  | 1 | 12 | 0.08 | 0.67 | 0.00 | 0.25 | 1.25 | 1 |
| DT | 1T-5  | 3    | 1 | 3 | 7  | 1 | 12 | 0.08 | 0.58 | 0.25 | 0.08 | 1.08 | 0 |
| DT | 1T-5  | 675  | 2 | 2 | 8  | 1 | 13 | 0.08 | 0.62 | 0.15 | 0.15 | 1.15 | 0 |
| DT | 1T-5  | 677  | 1 | 4 | 7  | 2 | 14 | 0.14 | 0.50 | 0.29 | 0.07 | 1.07 | 0 |
| DT | 1T-5  | 676  | 3 | 0 | 8  | 1 | 12 | 0.08 | 0.67 | 0.00 | 0.25 | 1.25 | 1 |
| DT | 1T-5  | 18   | 1 | 2 | 7  | 0 | 10 | 0.00 | 0.70 | 0.20 | 0.10 | 1.10 | 0 |
| DT | 1T-5  | 32   | 2 | 1 | 8  | 3 | 14 | 0.21 | 0.57 | 0.07 | 0.14 | 1.14 | 1 |
| DT | 1T-5  | 7    | 1 | 1 | 7  | 2 | 11 | 0.18 | 0.64 | 0.09 | 0.09 | 1.09 | 1 |
| DT | 1T-5  | 8    | 2 | 1 | 7  | 1 | 11 | 0.09 | 0.64 | 0.09 | 0.18 | 1.18 | 0 |
| DT | 1T-5  | 10   | 3 | 1 | 7  | 2 | 13 | 0.15 | 0.54 | 0.08 | 0.23 | 1.23 | 1 |
| DT | 1T-5  | 674  | 1 | 1 | 10 | 1 | 13 | 0.08 | 0.77 | 0.08 | 0.08 | 1.08 | 0 |
| DT | 1T-5  | 681  | 2 | 3 | 5  | 2 | 12 | 0.17 | 0.42 | 0.25 | 0.17 | 1.17 | 0 |
| DT | 1T-5  | 15   | 3 | 0 | 9  | 3 | 15 | 0.20 | 0.60 | 0.00 | 0.20 | 1.20 | 0 |
| DT | 1T-5  | 2    | 2 | 2 | 5  | 2 | 11 | 0.18 | 0.45 | 0.18 | 0.18 | 1.18 | 0 |
| DT | 4T-15 | 2    | 2 | 4 | 7  | 1 | 14 | 0.07 | 0.50 | 0.29 | 0.14 | 1.14 | 0 |
| DT | 4T-15 | 3    | 4 | 3 | 6  | 3 | 16 | 0.19 | 0.38 | 0.19 | 0.25 | 1.25 | 0 |
| DT | 4T-15 | 4    | 5 | 2 | 4  | 2 | 13 | 0.15 | 0.31 | 0.15 | 0.38 | 1.38 | 1 |
| DT | 4T-15 | 28   | 1 | 1 | 8  | 2 | 12 | 0.17 | 0.67 | 0.08 | 0.08 | 1.08 | 0 |
| DT | 4T-15 | 60.1 | 3 | 3 | 4  | 5 | 15 | 0.33 | 0.27 | 0.20 | 0.20 | 1.20 | 0 |
| DT | 4T-15 | 64   | 6 | 1 | 5  | 2 | 14 | 0.14 | 0.36 | 0.07 | 0.43 | 1.43 | 0 |
| DT | 4T-15 | 66   | 4 | 2 | 4  | 4 | 14 | 0.29 | 0.29 | 0.14 | 0.29 | 1.29 | 0 |
| DT | 4T-15 | 67   | 4 | 2 | 7  | 0 | 13 | 0.00 | 0.54 | 0.15 | 0.31 | 1.31 | 1 |
| DT | 4T-15 | 70   | 5 | 1 | 6  | 1 | 13 | 0.08 | 0.46 | 0.08 | 0.38 | 1.38 | 1 |
| DT | 4T-15 | 71   | 2 | 1 | 10 | 1 | 14 | 0.07 | 0.71 | 0.07 | 0.14 | 1.14 | 1 |
| DT | 4T-15 | 72   | 4 | 3 | 4  | 2 | 13 | 0.15 | 0.31 | 0.23 | 0.31 | 1.31 | 1 |
| DT | 4T-15 | 73   | 7 | 2 | 8  | 0 | 17 | 0.00 | 0.47 | 0.12 | 0.41 | 1.41 | 0 |
| DT | 4T-15 | 76   | 4 | 2 | 6  | 3 | 15 | 0.20 | 0.40 | 0.13 | 0.27 | 1.27 | 0 |
| DT | 4T-15 | 79   | 4 | 1 | 6  | 1 | 12 | 0.08 | 0.50 | 0.08 | 0.33 | 1.33 | 0 |

|    |       |     |    |   |    |   |    |      |      |      |      |      |   |
|----|-------|-----|----|---|----|---|----|------|------|------|------|------|---|
| DT | 4T-15 | 85  | 3  | 3 | 10 | 0 | 16 | 0.00 | 0.63 | 0.19 | 0.19 | 1.19 | 1 |
| DT | 5T-4  | 1   | 4  | 1 | 6  | 4 | 15 | 0.27 | 0.40 | 0.07 | 0.27 | 1.27 | 1 |
| DT | 5T-4  | 3   | 3  | 0 | 7  | 1 | 11 | 0.09 | 0.64 | 0.00 | 0.27 | 1.27 | 1 |
| DT | 5T-4  | 9   | 2  | 1 | 6  | 3 | 12 | 0.25 | 0.50 | 0.08 | 0.17 | 1.17 | 1 |
| DT | 5T-4  | 12  | 1  | 0 | 10 | 1 | 12 | 0.08 | 0.83 | 0.00 | 0.08 | 1.08 | 1 |
| DT | 5T-4  | 17  | 2  | 1 | 7  | 1 | 11 | 0.09 | 0.64 | 0.09 | 0.18 | 1.18 | 1 |
| DT | 5T-4  | 19  | 0  | 3 | 3  | 3 | 9  | 0.33 | 0.33 | 0.33 | 0.00 | 1.00 | 0 |
| DT | 5T-4  | 20  | 2  | 3 | 3  | 5 | 13 | 0.38 | 0.23 | 0.23 | 0.15 | 1.15 | 1 |
| DT | 5T-4  | 21  | 6  | 2 | 3  | 1 | 12 | 0.08 | 0.25 | 0.17 | 0.50 | 1.50 | 1 |
| DT | 5T-4  | 22  | 1  | 1 | 7  | 2 | 11 | 0.18 | 0.64 | 0.09 | 0.09 | 1.09 | 1 |
| DT | 5T-4  | 23  | 1  | 1 | 8  | 0 | 10 | 0.00 | 0.80 | 0.10 | 0.10 | 1.10 | 1 |
| DT | 5T-4  | 27  | 1  | 3 | 6  | 1 | 11 | 0.09 | 0.55 | 0.27 | 0.09 | 1.09 | 0 |
| DT | 5T-4  | 29  | 3  | 2 | 7  | 2 | 14 | 0.14 | 0.50 | 0.14 | 0.21 | 1.21 | 0 |
| DT | 5T-4  | 30  | 4  | 3 | 6  | 1 | 14 | 0.07 | 0.43 | 0.21 | 0.29 | 1.29 | 0 |
| DT | 5T-4  | 33  | 2  | 3 | 3  | 2 | 10 | 0.20 | 0.30 | 0.30 | 0.20 | 1.20 | 0 |
| DT | 5T-4  | 38  | 1  | 2 | 8  | 4 | 15 | 0.27 | 0.53 | 0.13 | 0.07 | 1.07 | 1 |
| DT | 6T-11 | 1   | 1  | 1 | 7  | 2 | 11 | 0.18 | 0.64 | 0.09 | 0.09 | 1.09 | 0 |
| DT | 6T-11 | 4   | 5  | 0 | 8  | 2 | 15 | 0.13 | 0.53 | 0.00 | 0.33 | 1.33 | 0 |
| DT | 6T-11 | 5   | 2  | 3 | 7  | 3 | 15 | 0.20 | 0.47 | 0.20 | 0.13 | 1.13 | 0 |
| DT | 6T-11 | 7   | 3  | 1 | 9  | 2 | 15 | 0.13 | 0.60 | 0.07 | 0.20 | 1.20 | 1 |
| DT | 6T-11 | 9   | 4  | 1 | 6  | 2 | 13 | 0.15 | 0.46 | 0.08 | 0.31 | 1.31 | 0 |
| DT | 6T-11 | 11  | 5  | 1 | 8  | 1 | 15 | 0.07 | 0.53 | 0.07 | 0.33 | 1.33 | 0 |
| DT | 6T-11 | 13  | 1  | 0 | 9  | 2 | 12 | 0.17 | 0.75 | 0.00 | 0.08 | 1.08 | 0 |
| DT | 6T-11 | 14  | 2  | 4 | 3  | 2 | 11 | 0.18 | 0.27 | 0.36 | 0.18 | 1.18 | 0 |
| DT | 6T-11 | 28  | 1  | 2 | 9  | 1 | 13 | 0.08 | 0.69 | 0.15 | 0.08 | 1.08 | 0 |
| DT | 6T-11 | 16  | 7  | 1 | 5  | 2 | 15 | 0.13 | 0.33 | 0.07 | 0.47 | 1.47 | 0 |
| DT | 6T-11 | 18  | 1  | 0 | 5  | 4 | 10 | 0.40 | 0.50 | 0.00 | 0.10 | 1.10 | 0 |
| DT | 6T-11 | 19  | 2  | 3 | 7  | 0 | 12 | 0.00 | 0.58 | 0.25 | 0.17 | 1.17 | 0 |
| DT | 6T-11 | 21  | 2  | 2 | 9  | 0 | 13 | 0.00 | 0.69 | 0.15 | 0.15 | 1.15 | 1 |
| DT | 6T-11 | 22  | 0  | 3 | 8  | 1 | 12 | 0.08 | 0.67 | 0.25 | 0.00 | 1.00 | 1 |
| DT | 6T-11 | 26  | 1  | 3 | 8  | 2 | 14 | 0.14 | 0.57 | 0.21 | 0.07 | 1.07 | 0 |
| TD | 143   | 1   | 5  | 0 | 4  | 2 | 11 | 0.18 | 0.36 | 0.00 | 0.45 | 1.45 | 0 |
| TD | 143   | 2   | 2  | 0 | 8  | 1 | 11 | 0.09 | 0.73 | 0.00 | 0.18 | 1.18 | 1 |
| TD | 143   | 3   | 3  | 1 | 8  | 3 | 15 | 0.20 | 0.53 | 0.07 | 0.20 | 1.20 | 0 |
| TD | 143   | 4   | 1  | 2 | 12 | 0 | 15 | 0.00 | 0.80 | 0.13 | 0.07 | 1.07 | 1 |
| TD | 143   | 5   | 1  | 1 | 8  | 3 | 13 | 0.23 | 0.62 | 0.08 | 0.08 | 1.08 | 0 |
| TD | 143   | 6   | 1  | 2 | 8  | 0 | 11 | 0.00 | 0.73 | 0.18 | 0.09 | 1.09 | 1 |
| TD | 143   | 7   | 3  | 0 | 8  | 1 | 12 | 0.08 | 0.67 | 0.00 | 0.25 | 1.25 | 1 |
| TD | 143   | 8   | 3  | 4 | 4  | 1 | 12 | 0.08 | 0.33 | 0.33 | 0.25 | 1.25 | 0 |
| TD | 143   | 9.1 | 3  | 1 | 6  | 6 | 16 | 0.38 | 0.38 | 0.06 | 0.19 | 1.19 | 0 |
| TD | 143   | 9.2 | 7  | 0 | 5  | 4 | 16 | 0.25 | 0.31 | 0.00 | 0.44 | 1.44 | 0 |
| TD | 143   | 10  | 1  | 1 | 7  | 2 | 11 | 0.18 | 0.64 | 0.09 | 0.09 | 1.09 | 0 |
| TD | 143   | 11  | 10 | 1 | 2  | 1 | 14 | 0.07 | 0.14 | 0.07 | 0.71 | 1.71 | 0 |

|    |       |    |   |   |    |   |    |      |      |      |      |      |   |
|----|-------|----|---|---|----|---|----|------|------|------|------|------|---|
| TD | 143   | 13 | 4 | 3 | 2  | 4 | 13 | 0.31 | 0.15 | 0.23 | 0.31 | 1.31 | 0 |
| TD | 143   | 14 | 3 | 1 | 6  | 1 | 11 | 0.09 | 0.55 | 0.09 | 0.27 | 1.27 | 0 |
| TD | 1T-17 | 1  | 4 | 1 | 10 | 0 | 15 | 0.00 | 0.67 | 0.07 | 0.27 | 1.27 | 0 |
| TD | 1T-17 | 3  | 3 | 0 | 4  | 4 | 11 | 0.36 | 0.36 | 0.00 | 0.27 | 1.27 | 1 |
| TD | 1T-17 | 10 | 2 | 2 | 8  | 2 | 14 | 0.14 | 0.57 | 0.14 | 0.14 | 1.14 | 1 |
| TD | 1T-17 | 13 | 1 | 0 | 11 | 0 | 12 | 0.00 | 0.92 | 0.00 | 0.08 | 1.08 | 1 |
| TD | 1T-17 | 14 | 4 | 1 | 9  | 0 | 14 | 0.00 | 0.64 | 0.07 | 0.29 | 1.29 | 0 |
| TD | 1T-17 | 15 | 3 | 1 | 9  | 1 | 14 | 0.07 | 0.64 | 0.07 | 0.21 | 1.21 | 0 |
| TD | 1T-17 | 16 | 1 | 0 | 12 | 2 | 15 | 0.13 | 0.80 | 0.00 | 0.07 | 1.07 | 0 |
| TD | 1T-17 | 17 | 0 | 4 | 6  | 1 | 11 | 0.09 | 0.55 | 0.36 | 0.00 | 1.00 | 1 |
| TD | 1T-17 | 20 | 2 | 2 | 7  | 3 | 14 | 0.21 | 0.50 | 0.14 | 0.14 | 1.14 | 0 |
| TD | 1T-17 | 23 | 2 | 3 | 6  | 1 | 12 | 0.08 | 0.50 | 0.25 | 0.17 | 1.17 | 1 |
| TD | 1T-17 | 28 | 2 | 1 | 8  | 2 | 13 | 0.15 | 0.62 | 0.08 | 0.15 | 1.15 | 0 |
| TD | 1T-17 | 30 | 2 | 1 | 7  | 2 | 12 | 0.17 | 0.58 | 0.08 | 0.17 | 1.17 | 0 |
| TD | 1T-17 | 35 | 2 | 3 | 3  | 4 | 12 | 0.33 | 0.25 | 0.25 | 0.17 | 1.17 | 1 |
| TD | 1T-17 | 36 | 4 | 0 | 7  | 3 | 14 | 0.21 | 0.50 | 0.00 | 0.29 | 1.29 | 1 |
| TD | 1T-17 | 37 | 0 | 1 | 8  | 5 | 14 | 0.36 | 0.57 | 0.07 | 0.00 | 1.00 | 1 |
| TD | 2T-19 | 1  | 2 | 0 | 7  | 3 | 12 | 0.25 | 0.58 | 0.00 | 0.17 | 1.17 | 0 |
| TD | 2T-19 | 2  | 3 | 1 | 4  | 2 | 10 | 0.20 | 0.40 | 0.10 | 0.30 | 1.30 | 1 |
| TD | 2T-19 | 3  | 2 | 2 | 7  | 3 | 14 | 0.21 | 0.50 | 0.14 | 0.14 | 1.14 | 1 |
| TD | 2T-19 | 4  | 2 | 0 | 8  | 2 | 12 | 0.17 | 0.67 | 0.00 | 0.17 | 1.17 | 1 |
| TD | 2T-19 | 5  | 6 | 1 | 2  | 3 | 12 | 0.25 | 0.17 | 0.08 | 0.50 | 1.50 | 0 |
| TD | 2T-19 | 6  | 3 | 1 | 8  | 3 | 15 | 0.20 | 0.53 | 0.07 | 0.20 | 1.20 | 0 |
| TD | 2T-19 | 7  | 7 | 1 | 6  | 0 | 14 | 0.00 | 0.43 | 0.07 | 0.50 | 1.50 | 1 |
| TD | 2T-19 | 9  | 5 | 1 | 4  | 4 | 14 | 0.29 | 0.29 | 0.07 | 0.36 | 1.36 | 0 |
| TD | 2T-19 | 11 | 4 | 0 | 7  | 2 | 13 | 0.15 | 0.54 | 0.00 | 0.31 | 1.31 | 1 |
| TD | 2T-19 | 12 | 4 | 0 | 6  | 1 | 11 | 0.09 | 0.55 | 0.00 | 0.36 | 1.36 | 0 |
| TD | 2T-19 | 15 | 2 | 1 | 2  | 6 | 11 | 0.55 | 0.18 | 0.09 | 0.18 | 1.18 | 1 |
| TD | 2T-19 | 20 | 3 | 0 | 6  | 2 | 11 | 0.18 | 0.55 | 0.00 | 0.27 | 1.27 | 1 |
| TD | 2T-19 | 21 | 4 | 1 | 10 | 0 | 15 | 0.00 | 0.67 | 0.07 | 0.27 | 1.27 | 0 |
| TD | 2T-19 | 22 | 4 | 0 | 6  | 4 | 14 | 0.29 | 0.43 | 0.00 | 0.29 | 1.29 | 0 |
| TD | 2T-19 | 25 | 4 | 1 | 8  | 1 | 14 | 0.07 | 0.57 | 0.07 | 0.29 | 1.29 | 0 |
| TD | 2T-25 | 1  | 3 | 0 | 7  | 4 | 14 | 0.29 | 0.50 | 0.00 | 0.21 | 1.21 | 1 |
| TD | 2T-25 | 2  | 1 | 0 | 7  | 5 | 13 | 0.38 | 0.54 | 0.00 | 0.08 | 1.08 | 1 |
| TD | 2T-25 | 4  | 3 | 0 | 6  | 2 | 11 | 0.18 | 0.55 | 0.00 | 0.27 | 1.27 | 0 |
| TD | 2T-25 | 7  | 3 | 1 | 9  | 1 | 14 | 0.07 | 0.64 | 0.07 | 0.21 | 1.21 | 1 |
| TD | 2T-25 | 8  | 2 | 3 | 7  | 3 | 15 | 0.20 | 0.47 | 0.20 | 0.13 | 1.13 | 0 |
| TD | 2T-25 | 10 | 2 | 2 | 9  | 2 | 15 | 0.13 | 0.60 | 0.13 | 0.13 | 1.13 | 1 |
| TD | 2T-25 | 11 | 4 | 1 | 7  | 2 | 14 | 0.14 | 0.50 | 0.07 | 0.29 | 1.29 | 0 |
| TD | 2T-37 | 2  | 1 | 1 | 10 | 3 | 15 | 0.20 | 0.67 | 0.07 | 0.07 | 1.07 | 1 |
| TD | 2T-37 | 3  | 1 | 1 | 6  | 4 | 12 | 0.33 | 0.50 | 0.08 | 0.08 | 1.08 | 0 |
| TD | 2T-37 | 4  | 1 | 3 | 5  | 3 | 12 | 0.25 | 0.42 | 0.25 | 0.08 | 1.08 | 1 |
| TD | 2T-37 | 5  | 2 | 5 | 7  | 1 | 15 | 0.07 | 0.47 | 0.33 | 0.13 | 1.13 | 0 |

|    |       |      |   |   |   |   |    |      |      |      |      |      |   |
|----|-------|------|---|---|---|---|----|------|------|------|------|------|---|
| TD | 2T-37 | 6    | 6 | 1 | 1 | 2 | 10 | 0.20 | 0.10 | 0.10 | 0.60 | 1.60 | 1 |
| TD | 2T-37 | 8    | 0 | 2 | 8 | 5 | 15 | 0.33 | 0.53 | 0.13 | 0.00 | 1.00 | 0 |
| TD | 2T-37 | 9    | 1 | 2 | 5 | 5 | 13 | 0.38 | 0.38 | 0.15 | 0.08 | 1.08 | 0 |
| TD | 2T-37 | 10   | 0 | 1 | 7 | 4 | 12 | 0.33 | 0.58 | 0.08 | 0.00 | 1.00 | 1 |
| TD | 2T-37 | 11   | 1 | 2 | 7 | 1 | 11 | 0.09 | 0.64 | 0.18 | 0.09 | 1.09 | 0 |
| TD | 2T-37 | 12   | 4 | 0 | 4 | 4 | 12 | 0.33 | 0.33 | 0.00 | 0.33 | 1.33 | 1 |
| TD | 2T-37 | 13   | 0 | 2 | 7 | 2 | 11 | 0.18 | 0.64 | 0.18 | 0.00 | 1.00 | 0 |
| TD | 2T-37 | 14   | 0 | 2 | 7 | 3 | 12 | 0.25 | 0.58 | 0.17 | 0.00 | 1.00 | 1 |
| TD | 2T-37 | 15   | 1 | 2 | 7 | 4 | 14 | 0.29 | 0.50 | 0.14 | 0.07 | 1.07 | 0 |
| TD | 2T-37 | 17   | 3 | 1 | 7 | 4 | 15 | 0.27 | 0.47 | 0.07 | 0.20 | 1.20 | 0 |
| TD | 2T-37 | 21   | 0 | 3 | 6 | 2 | 11 | 0.18 | 0.55 | 0.27 | 0.00 | 1.00 | 1 |
| TD | 3T-16 | 2    | 3 | 2 | 7 | 1 | 13 | 0.08 | 0.54 | 0.15 | 0.23 | 1.23 | 1 |
| TD | 3T-16 | 7    | 2 | 2 | 5 | 4 | 13 | 0.31 | 0.38 | 0.15 | 0.15 | 1.15 | 1 |
| TD | 3T-16 | 25   | 3 | 1 | 6 | 2 | 12 | 0.17 | 0.50 | 0.08 | 0.25 | 1.25 | 1 |
| TD | 3T-16 | 27   | 5 | 0 | 8 | 0 | 13 | 0.00 | 0.62 | 0.00 | 0.38 | 1.38 | 1 |
| TD | 3T-16 | 35   | 4 | 1 | 8 | 1 | 14 | 0.07 | 0.57 | 0.07 | 0.29 | 1.29 | 1 |
| TD | 3T-16 | 41   | 3 | 0 | 6 | 5 | 14 | 0.36 | 0.43 | 0.00 | 0.21 | 1.21 | 0 |
| TD | 3T-16 | 44   | 3 | 1 | 6 | 3 | 13 | 0.23 | 0.46 | 0.08 | 0.23 | 1.23 | 1 |
| TD | 3T-16 | 47   | 2 | 1 | 7 | 2 | 12 | 0.17 | 0.58 | 0.08 | 0.17 | 1.17 | 0 |
| TD | 3T-16 | 51   | 2 | 1 | 6 | 3 | 12 | 0.25 | 0.50 | 0.08 | 0.17 | 1.17 | 1 |
| TD | 3T-16 | 52   | 1 | 1 | 7 | 5 | 14 | 0.36 | 0.50 | 0.07 | 0.07 | 1.07 | 0 |
| TD | 3T-16 | 63   | 1 | 1 | 9 | 1 | 12 | 0.08 | 0.75 | 0.08 | 0.08 | 1.08 | 1 |
| TD | 3T-16 | 64   | 1 | 2 | 9 | 2 | 14 | 0.14 | 0.64 | 0.14 | 0.07 | 1.07 | 1 |
| TD | 3T-16 | 76   | 3 | 1 | 7 | 1 | 12 | 0.08 | 0.58 | 0.08 | 0.25 | 1.25 | 1 |
| TD | 3T-16 | 81   | 1 | 0 | 9 | 3 | 13 | 0.23 | 0.69 | 0.00 | 0.08 | 1.08 | 0 |
| TD | 3T-16 | 82   | 2 | 1 | 7 | 2 | 12 | 0.17 | 0.58 | 0.08 | 0.17 | 1.17 | 1 |
| TT | 151   | 3    | 4 | 1 | 6 | 2 | 13 | 0.15 | 0.46 | 0.08 | 0.31 | 1.31 | 1 |
| TT | 151   | 5    | 4 | 1 | 3 | 2 | 10 | 0.20 | 0.30 | 0.10 | 0.40 | 1.40 | 1 |
| TT | 151   | 7    | 2 | 2 | 5 | 2 | 11 | 0.18 | 0.45 | 0.18 | 0.18 | 1.18 | 1 |
| TT | 151   | 8    | 2 | 3 | 6 | 1 | 12 | 0.08 | 0.50 | 0.25 | 0.17 | 1.17 | 1 |
| TT | 151   | 9    | 4 | 0 | 9 | 0 | 13 | 0.00 | 0.69 | 0.00 | 0.31 | 1.31 | 0 |
| TT | 151   | 10   | 2 | 1 | 6 | 4 | 13 | 0.31 | 0.46 | 0.08 | 0.15 | 1.15 | 0 |
| TT | 151   | 16   | 4 | 1 | 4 | 2 | 11 | 0.18 | 0.36 | 0.09 | 0.36 | 1.36 | 1 |
| TT | 151   | 18.2 | 2 | 2 | 6 | 3 | 13 | 0.23 | 0.46 | 0.15 | 0.15 | 1.15 | 1 |
| TT | 151   | 19   | 4 | 2 | 5 | 1 | 12 | 0.08 | 0.42 | 0.17 | 0.33 | 1.33 | 1 |
| TT | 151   | 21   | 4 | 0 | 4 | 3 | 11 | 0.27 | 0.36 | 0.00 | 0.36 | 1.36 | 0 |
| TT | 151   | 24   | 4 | 1 | 4 | 3 | 12 | 0.25 | 0.33 | 0.08 | 0.33 | 1.33 | 0 |
| TT | 151   | 26   | 3 | 1 | 7 | 2 | 13 | 0.15 | 0.54 | 0.08 | 0.23 | 1.23 | 0 |
| TT | 151   | 27   | 4 | 0 | 8 | 2 | 14 | 0.14 | 0.57 | 0.00 | 0.29 | 1.29 | 1 |
| TT | 151   | 31   | 3 | 2 | 2 | 3 | 10 | 0.30 | 0.20 | 0.20 | 0.30 | 1.30 | 1 |
| TT | 151   | 33   | 2 | 1 | 5 | 3 | 11 | 0.27 | 0.45 | 0.09 | 0.18 | 1.18 | 1 |
| TT | 191   | 1    | 4 | 1 | 9 | 2 | 16 | 0.13 | 0.56 | 0.06 | 0.25 | 1.25 | 0 |
| TT | 191   | 2    | 1 | 2 | 9 | 1 | 13 | 0.08 | 0.69 | 0.15 | 0.08 | 1.08 | 1 |

|    |       |    |   |   |    |   |    |      |      |      |      |      |   |
|----|-------|----|---|---|----|---|----|------|------|------|------|------|---|
| TT | 191   | 3  | 1 | 1 | 8  | 4 | 14 | 0.29 | 0.57 | 0.07 | 0.07 | 1.07 | 0 |
| TT | 191   | 4  | 2 | 0 | 9  | 2 | 13 | 0.15 | 0.69 | 0.00 | 0.15 | 1.15 | 0 |
| TT | 191   | 5  | 3 | 3 | 7  | 3 | 16 | 0.19 | 0.44 | 0.19 | 0.19 | 1.19 | 0 |
| TT | 191   | 6  | 2 | 2 | 5  | 2 | 11 | 0.18 | 0.45 | 0.18 | 0.18 | 1.18 | 1 |
| TT | 191   | 8  | 2 | 0 | 6  | 6 | 14 | 0.43 | 0.43 | 0.00 | 0.14 | 1.14 | 0 |
| TT | 191   | 9  | 1 | 1 | 11 | 2 | 15 | 0.13 | 0.73 | 0.07 | 0.07 | 1.07 | 0 |
| TT | 191   | 13 | 5 | 4 | 5  | 1 | 15 | 0.07 | 0.33 | 0.27 | 0.33 | 1.33 | 0 |
| TT | 191   | 14 | 4 | 1 | 8  | 1 | 14 | 0.07 | 0.57 | 0.07 | 0.29 | 1.29 | 1 |
| TT | 191   | 15 | 4 | 3 | 5  | 3 | 15 | 0.20 | 0.33 | 0.20 | 0.27 | 1.27 | 1 |
| TT | 191   | 16 | 1 | 2 | 5  | 2 | 10 | 0.20 | 0.50 | 0.20 | 0.10 | 1.10 | 1 |
| TT | 191   | 19 | 1 | 2 | 6  | 4 | 13 | 0.31 | 0.46 | 0.15 | 0.08 | 1.08 | 1 |
| TT | 191   | 22 | 2 | 1 | 9  | 3 | 15 | 0.20 | 0.60 | 0.07 | 0.13 | 1.13 | 0 |
| TT | 191   | 25 | 2 | 1 | 5  | 4 | 12 | 0.33 | 0.42 | 0.08 | 0.17 | 1.17 | 1 |
| TT | 1T-4  | 4  | 2 | 0 | 6  | 5 | 13 | 0.38 | 0.46 | 0.00 | 0.15 | 1.15 | 1 |
| TT | 1T-4  | 5  | 4 | 0 | 8  | 1 | 13 | 0.08 | 0.62 | 0.00 | 0.31 | 1.31 | 1 |
| TT | 1T-4  | 6  | 5 | 1 | 6  | 4 | 16 | 0.25 | 0.38 | 0.06 | 0.31 | 1.31 | 1 |
| TT | 1T-4  | 1  | 2 | 1 | 6  | 1 | 10 | 0.10 | 0.60 | 0.10 | 0.20 | 1.20 | 0 |
| TT | 1T-4  | 9  | 4 | 2 | 8  | 2 | 16 | 0.13 | 0.50 | 0.13 | 0.25 | 1.25 | 0 |
| TT | 1T-4  | 10 | 3 | 0 | 5  | 6 | 14 | 0.43 | 0.36 | 0.00 | 0.21 | 1.21 | 1 |
| TT | 1T-4  | 11 | 2 | 0 | 7  | 4 | 13 | 0.31 | 0.54 | 0.00 | 0.15 | 1.15 | 1 |
| TT | 1T-4  | 14 | 2 | 3 | 7  | 1 | 13 | 0.08 | 0.54 | 0.23 | 0.15 | 1.15 | 0 |
| TT | 1T-4  | 12 | 1 | 1 | 7  | 1 | 10 | 0.10 | 0.70 | 0.10 | 0.10 | 1.10 | 1 |
| TT | 1T-4  | 17 | 4 | 0 | 4  | 4 | 12 | 0.33 | 0.33 | 0.00 | 0.33 | 1.33 | 0 |
| TT | 1T-4  | 13 | 5 | 0 | 10 | 1 | 16 | 0.06 | 0.63 | 0.00 | 0.31 | 1.31 | 0 |
| TT | 1T-4  | 15 | 0 | 3 | 4  | 4 | 11 | 0.36 | 0.36 | 0.27 | 0.00 | 1.00 | 0 |
| TT | 1T-4  | 16 | 2 | 0 | 6  | 4 | 12 | 0.33 | 0.50 | 0.00 | 0.17 | 1.17 | 0 |
| TT | 1T-4  | 19 | 1 | 1 | 8  | 4 | 14 | 0.29 | 0.57 | 0.07 | 0.07 | 1.07 | 1 |
| TT | 1T-4  | 20 | 5 | 0 | 4  | 5 | 14 | 0.36 | 0.29 | 0.00 | 0.36 | 1.36 | 0 |
| TT | 2T-33 | 3  | 1 | 0 | 7  | 3 | 11 | 0.27 | 0.64 | 0.00 | 0.09 | 1.09 | 1 |
| TT | 2T-33 | 4  | 0 | 1 | 10 | 3 | 14 | 0.21 | 0.71 | 0.07 | 0.00 | 1.00 | 0 |
| TT | 2T-33 | 5  | 1 | 1 | 7  | 3 | 12 | 0.25 | 0.58 | 0.08 | 0.08 | 1.08 | 0 |
| TT | 2T-33 | 6  | 2 | 2 | 6  | 3 | 13 | 0.23 | 0.46 | 0.15 | 0.15 | 1.15 | 1 |
| TT | 2T-33 | 7  | 1 | 1 | 6  | 3 | 11 | 0.27 | 0.55 | 0.09 | 0.09 | 1.09 | 1 |
| TT | 2T-33 | 8  | 2 | 1 | 4  | 5 | 12 | 0.42 | 0.33 | 0.08 | 0.17 | 1.17 | 1 |
| TT | 2T-33 | 9  | 0 | 1 | 6  | 4 | 11 | 0.36 | 0.55 | 0.09 | 0.00 | 1.00 | 1 |
| TT | 2T-33 | 10 | 1 | 0 | 4  | 5 | 10 | 0.50 | 0.40 | 0.00 | 0.10 | 1.10 | 1 |
| TT | 2T-33 | 11 | 2 | 3 | 4  | 1 | 10 | 0.10 | 0.40 | 0.30 | 0.20 | 1.20 | 1 |
| TT | 2T-33 | 12 | 1 | 0 | 9  | 1 | 11 | 0.09 | 0.82 | 0.00 | 0.09 | 1.09 | 0 |
| TT | 2T-33 | 14 | 3 | 0 | 2  | 5 | 10 | 0.50 | 0.20 | 0.00 | 0.30 | 1.30 | 1 |
| TT | 2T-33 | 17 | 2 | 1 | 4  | 3 | 10 | 0.30 | 0.40 | 0.10 | 0.20 | 1.20 | 1 |
| TT | 2T-33 | 18 | 3 | 0 | 8  | 2 | 13 | 0.15 | 0.62 | 0.00 | 0.23 | 1.23 | 0 |
| TT | 2T-33 | 19 | 3 | 1 | 6  | 2 | 12 | 0.17 | 0.50 | 0.08 | 0.25 | 1.25 | 1 |
| TT | 3T-24 | 2  | 2 | 2 | 9  | 0 | 13 | 0.00 | 0.69 | 0.15 | 0.15 | 1.15 | 1 |



|    |       |     |   |   |    |   |    |      |      |      |      |      |   |
|----|-------|-----|---|---|----|---|----|------|------|------|------|------|---|
| TT | 3T-24 | 3   | 2 | 1 | 7  | 4 | 14 | 0.29 | 0.50 | 0.07 | 0.14 | 1.14 | 0 |
| TT | 3T-24 | 7   | 0 | 4 | 6  | 4 | 14 | 0.29 | 0.43 | 0.29 | 0.00 | 1.00 | 1 |
| TT | 3T-24 | 8   | 4 | 1 | 8  | 3 | 16 | 0.19 | 0.50 | 0.06 | 0.25 | 1.25 | 0 |
| TT | 3T-24 | 9   | 2 | 1 | 9  | 1 | 13 | 0.08 | 0.69 | 0.08 | 0.15 | 1.15 | 0 |
| TT | 3T-24 | 10  | 1 | 2 | 7  | 5 | 15 | 0.33 | 0.47 | 0.13 | 0.07 | 1.07 | 1 |
| TT | 3T-24 | 12  | 2 | 2 | 9  | 1 | 14 | 0.07 | 0.64 | 0.14 | 0.14 | 1.14 | 0 |
| TT | 3T-24 | 13  | 0 | 1 | 11 | 2 | 14 | 0.14 | 0.79 | 0.07 | 0.00 | 1.00 | 1 |
| TT | 3T-24 | 16  | 5 | 0 | 5  | 4 | 14 | 0.29 | 0.36 | 0.00 | 0.36 | 1.36 | 0 |
| TT | 3T-24 | 17  | 2 | 0 | 7  | 3 | 12 | 0.25 | 0.58 | 0.00 | 0.17 | 1.17 | 0 |
| TT | 4T-8  | 1   | 2 | 3 | 1  | 4 | 10 | 0.40 | 0.10 | 0.30 | 0.20 | 1.20 | 1 |
| TT | 4T-8  | 3   | 2 | 3 | 4  | 1 | 10 | 0.10 | 0.40 | 0.30 | 0.20 | 1.20 | 0 |
| TT | 4T-8  | 4   | 3 | 3 | 4  | 3 | 13 | 0.23 | 0.31 | 0.23 | 0.23 | 1.23 | 0 |
| TT | 4T-8  | 6.1 | 3 | 1 | 5  | 2 | 11 | 0.18 | 0.45 | 0.09 | 0.27 | 1.27 | 0 |
| TT | 4T-8  | 6.2 | 2 | 1 | 6  | 3 | 12 | 0.25 | 0.50 | 0.08 | 0.17 | 1.17 | 0 |
| TT | 4T-8  | 9   | 2 | 0 | 7  | 4 | 13 | 0.31 | 0.54 | 0.00 | 0.15 | 1.15 | 0 |
| TT | 4T-8  | 12  | 4 | 0 | 6  | 6 | 16 | 0.38 | 0.38 | 0.00 | 0.25 | 1.25 | 0 |
| TT | 4T-8  | 14  | 4 | 1 | 5  | 1 | 11 | 0.09 | 0.45 | 0.09 | 0.36 | 1.36 | 1 |
| TT | 4T-8  | 16  | 5 | 1 | 4  | 3 | 13 | 0.23 | 0.31 | 0.08 | 0.38 | 1.38 | 0 |
| TT | 4T-8  | 17  | 2 | 1 | 5  | 6 | 14 | 0.43 | 0.36 | 0.07 | 0.14 | 1.14 | 1 |
| TT | 4T-8  | 18  | 6 | 0 | 5  | 4 | 15 | 0.27 | 0.33 | 0.00 | 0.40 | 1.40 | 0 |
| TT | 4T-8  | 19  | 2 | 1 | 8  | 2 | 13 | 0.15 | 0.62 | 0.08 | 0.15 | 1.15 | 0 |
| TT | 4T-8  | 22  | 4 | 2 | 7  | 2 | 15 | 0.13 | 0.47 | 0.13 | 0.27 | 1.27 | 0 |
| TT | 4T-8  | 23  | 1 | 1 | 4  | 4 | 10 | 0.40 | 0.40 | 0.10 | 0.10 | 1.10 | 1 |
| TT | 4T-8  | 24  | 6 | 1 | 4  | 3 | 14 | 0.21 | 0.29 | 0.07 | 0.43 | 1.43 | 0 |
| TT | 6T-24 | 275 | 4 | 1 | 9  | 2 | 16 | 0.13 | 0.56 | 0.06 | 0.25 | 1.25 | 1 |
| TT | 6T-24 | 7   | 4 | 0 | 5  | 3 | 12 | 0.25 | 0.42 | 0.00 | 0.33 | 1.33 | 1 |
| TT | 6T-24 | 345 | 6 | 0 | 2  | 2 | 10 | 0.20 | 0.20 | 0.00 | 0.60 | 1.60 | 0 |
| TT | 6T-24 | 1   | 2 | 1 | 6  | 7 | 16 | 0.44 | 0.38 | 0.06 | 0.13 | 1.13 | 0 |
| TT | 6T-24 | 278 | 2 | 1 | 9  | 3 | 15 | 0.20 | 0.60 | 0.07 | 0.13 | 1.13 | 0 |
| TT | 6T-24 | 6   | 2 | 1 | 10 | 3 | 16 | 0.19 | 0.63 | 0.06 | 0.13 | 1.13 | 0 |
| TT | 6T-24 | 342 | 2 | 0 | 6  | 7 | 15 | 0.47 | 0.40 | 0.00 | 0.13 | 1.13 | 0 |
| TT | 6T-24 | 335 | 2 | 1 | 6  | 1 | 10 | 0.10 | 0.60 | 0.10 | 0.20 | 1.20 | 1 |
| TT | 6T-24 | 291 | 4 | 0 | 5  | 3 | 12 | 0.25 | 0.42 | 0.00 | 0.33 | 1.33 | 1 |
| TT | 6T-24 | 292 | 6 | 0 | 2  | 3 | 11 | 0.27 | 0.18 | 0.00 | 0.55 | 1.55 | 0 |
| TT | 6T-24 | 4   | 2 | 0 | 6  | 4 | 12 | 0.33 | 0.50 | 0.00 | 0.17 | 1.17 | 0 |
| TT | 6T-24 | 265 | 2 | 1 | 6  | 4 | 13 | 0.31 | 0.46 | 0.08 | 0.15 | 1.15 | 0 |
| TT | 6T-24 | 267 | 4 | 0 | 6  | 6 | 16 | 0.38 | 0.38 | 0.00 | 0.25 | 1.25 | 0 |
| TT | 6T-24 | 9   | 3 | 0 | 3  | 8 | 14 | 0.57 | 0.21 | 0.00 | 0.21 | 1.21 | 0 |
| TT | 6T-24 | 312 | 4 | 1 | 6  | 5 | 16 | 0.31 | 0.38 | 0.06 | 0.25 | 1.25 | 0 |

**Table S4 notes:** Primary phenotyping of metaphase spreads from plants segregating ASY1 and ASY3, experiment 1. Gen = genotype at both loci, where: DD = DDDD ASY1, DDDD ASY3; DT = DDDD ASY1, TTTT ASY3; TD = TTTT ASY1, DDDD ASY3; TT = TTTT ASY1, TTTT ASY3. All measures as for Table S1. All images are available at: doi: 10.3929/ethz-b-000386103

**Table S5:** Cytological trait values for *A. arenosa* tetraploids segregating ASY1 and ASY3 – experiment 2

| Gen | Plant              | Image |   |   |   |   |    |     |      | Proportions<br>(out of total scorable bivalents) |      |      |   | CO/Bv | MV |
|-----|--------------------|-------|---|---|---|---|----|-----|------|--------------------------------------------------|------|------|---|-------|----|
|     |                    |       | O | + | † | l | Ts | O   | +    | †                                                | l    |      |   |       |    |
| DD  | 88-1-A5x63-1-C4-1  | 2     | 1 | 5 | 4 | 3 | 13 | 0.1 | 0.38 | 0.31                                             | 0.23 | 1.08 | 0 |       |    |
| DD  | 88-1-A5x63-1-C4-1  | 4     | 1 | 1 | 9 | 3 | 14 | 0.1 | 0.07 | 0.64                                             | 0.21 | 1.07 | 1 |       |    |
| DD  | 88-1-A5x63-1-C4-1  | 5     | 1 | 3 | 4 | 4 | 12 | 0.1 | 0.25 | 0.33                                             | 0.33 | 1.08 | 1 |       |    |
| DD  | 88-1-A5x63-1-C4-1  | 6     | 4 | 2 | 5 | 4 | 15 | 0.3 | 0.13 | 0.33                                             | 0.27 | 1.27 | 0 |       |    |
| DD  | 88-1-A5x63-1-C4-1  | 8     | 2 | 2 | 3 | 6 | 13 | 0.2 | 0.15 | 0.23                                             | 0.46 | 1.15 | 1 |       |    |
| DD  | 88-1-A5x63-1-C4-1  | 9     | 0 | 6 | 6 | 3 | 15 | 0   | 0.4  | 0.4                                              | 0.2  | 1    | 0 |       |    |
| DD  | 88-1-A5x63-1-C4-1  | 10    | 3 | 2 | 7 | 4 | 16 | 0.2 | 0.13 | 0.44                                             | 0.25 | 1.19 | 1 |       |    |
| DD  | 88-1-A5x63-1-C4-1  | 11    | 4 | 1 | 7 | 3 | 15 | 0.3 | 0.07 | 0.47                                             | 0.2  | 1.27 | 1 |       |    |
| DD  | 88-1-A5x63-1-C4-1  | 12    | 2 | 4 | 7 | 2 | 15 | 0.1 | 0.27 | 0.47                                             | 0.13 | 1.13 | 0 |       |    |
| DD  | 88-1-A5x63-1-C4-1  | 13    | 4 | 5 | 3 | 0 | 12 | 0.3 | 0.42 | 0.25                                             | 0    | 1.33 | 1 |       |    |
| DD  | 88-1-A5x63-1-C4-4  | 1     | 2 | 4 | 5 | 0 | 11 | 0.2 | 0.36 | 0.45                                             | 0    | 1.18 | 1 |       |    |
| DD  | 88-1-A5x63-1-C4-4  | 2     | 0 | 5 | 5 | 3 | 13 | 0   | 0.38 | 0.38                                             | 0.23 | 1    | 1 |       |    |
| DD  | 88-1-A5x63-1-C4-4  | 3     | 2 | 5 | 3 | 3 | 13 | 0.2 | 0.38 | 0.23                                             | 0.23 | 1.15 | 1 |       |    |
| DD  | 88-1-A5x63-1-C4-4  | 4     | 1 | 4 | 4 | 3 | 12 | 0.1 | 0.33 | 0.33                                             | 0.25 | 1.08 | 1 |       |    |
| DD  | 88-1-A5x63-1-C4-4  | 5     | 0 | 3 | 7 | 6 | 16 | 0   | 0.19 | 0.44                                             | 0.38 | 1    | 1 |       |    |
| DD  | 88-1-A5x63-1-C4-4  | 6     | 3 | 3 | 4 | 3 | 13 | 0.2 | 0.23 | 0.31                                             | 0.23 | 1.23 | 0 |       |    |
| DD  | 88-1-A5x63-1-C4-4  | 7     | 1 | 5 | 4 | 1 | 11 | 0.1 | 0.45 | 0.36                                             | 0.09 | 1.09 | 1 |       |    |
| DD  | 88-1-A5x63-1-C4-6  | 1     | 0 | 3 | 5 | 3 | 11 | 0   | 0.27 | 0.45                                             | 0.27 | 1    | 1 |       |    |
| DD  | 88-1-A5x63-1-C4-6  | 2     | 3 | 3 | 5 | 2 | 13 | 0.2 | 0.23 | 0.38                                             | 0.15 | 1.23 | 1 |       |    |
| DD  | 88-1-A5x63-1-C4-6  | 3     | 2 | 6 | 3 | 2 | 13 | 0.2 | 0.46 | 0.23                                             | 0.15 | 1.15 | 0 |       |    |
| DD  | 88-1-A5x63-1-C4-6  | 4     | 0 | 4 | 7 | 0 | 11 | 0   | 0.36 | 0.64                                             | 0    | 1    | 1 |       |    |
| DD  | 88-1-A5x63-1-C4-6  | 5     | 1 | 5 | 4 | 2 | 12 | 0.1 | 0.42 | 0.33                                             | 0.17 | 1.08 | 1 |       |    |
| DD  | 88-1-A5x63-1-C4-6  | 6     | 1 | 4 | 7 | 1 | 13 | 0.1 | 0.31 | 0.54                                             | 0.08 | 1.08 | 1 |       |    |
| DD  | 88-1-A5x63-1-C4-6  | 8     | 4 | 4 | 4 | 1 | 13 | 0.3 | 0.31 | 0.31                                             | 0.08 | 1.31 | 1 |       |    |
| DD  | 88-1-A5x63-1-C4-6  | 9     | 0 | 4 | 3 | 1 | 8  | 0   | 0.5  | 0.38                                             | 0.13 | 1    | 1 |       |    |
| DD  | P1-17              | 55    | 3 | 2 | 3 | 2 | 11 | 0.3 | 0.18 | 0.27                                             | 0.18 | 1.36 | 0 |       |    |
| DD  | P1-17              | 93    | 2 | 4 | 4 | 1 | 11 | 0.2 | 0.36 | 0.36                                             | 0.09 | 1.18 | 1 |       |    |
| DD  | P1-17              | 107   | 1 | 5 | 6 | 2 | 15 | 0.1 | 0.33 | 0.4                                              | 0.13 | 1.13 | 1 |       |    |
| DD  | P1-17              | 115   | 1 | 1 | 5 | 5 | 12 | 0.1 | 0.08 | 0.42                                             | 0.42 | 1.08 | 1 |       |    |
| DD  | P1-17              | 116   | 1 | 5 | 6 | 2 | 14 | 0.1 | 0.36 | 0.43                                             | 0.14 | 1.07 | 1 |       |    |
| DD  | P1-17              | 117   | 1 | 5 | 6 | 3 | 16 | 0.1 | 0.31 | 0.38                                             | 0.19 | 1.13 | 0 |       |    |
| DD  | P1-17              | 120   | 0 | 6 | 6 | 0 | 12 | 0   | 0.5  | 0.5                                              | 0    | 1    | 1 |       |    |
| DD  | P1-17              | 126   | 3 | 4 | 2 | 0 | 10 | 0.3 | 0.4  | 0.2                                              | 0    | 1.4  | 1 |       |    |
| DD  | P1-17              | 129   | 6 | 3 | 1 | 2 | 12 | 0.5 | 0.25 | 0.08                                             | 0.17 | 1.5  | 1 |       |    |
| DD  | P1-17              | 1065  | 0 | 2 | 6 | 4 | 12 | 0   | 0.17 | 0.5                                              | 0.33 | 1    | 1 |       |    |
| DT  | 88-1-D4x88-1-A2-12 | 1     | 2 | 6 | 5 | 2 | 15 | 0.1 | 0.4  | 0.33                                             | 0.13 | 1.13 | 0 |       |    |
| DT  | 88-1-D4x88-1-A2-12 | 2     | 1 | 5 | 4 | 1 | 11 | 0.1 | 0.45 | 0.36                                             | 0.09 | 1.09 | 1 |       |    |
| DT  | 88-1-D4x88-1-A2-12 | 3     | 3 | 1 | 8 | 0 | 12 | 0.3 | 0.08 | 0.67                                             | 0    | 1.25 | 1 |       |    |
| DT  | 88-1-D4x88-1-A2-12 | 5     | 4 | 4 | 2 | 4 | 14 | 0.3 | 0.29 | 0.14                                             | 0.29 | 1.29 | 1 |       |    |
| DT  | 88-1-D4x88-1-A2-12 | 6     | 4 | 5 | 2 | 2 | 13 | 0.3 | 0.38 | 0.15                                             | 0.15 | 1.31 | 1 |       |    |

|    |                    |    |   |   |   |   |    |     |      |      |      |      |   |
|----|--------------------|----|---|---|---|---|----|-----|------|------|------|------|---|
| DT | 88-1-D4x88-1-A2-12 | 8  | 4 | 2 | 3 | 2 | 11 | 0.4 | 0.18 | 0.27 | 0.18 | 1.36 | 1 |
| DT | 88-1-D4x88-1-A2-12 | 9  | 1 | 5 | 2 | 3 | 11 | 0.1 | 0.45 | 0.18 | 0.27 | 1.09 | 0 |
| DT | 88-1-D4x88-1-A2-12 | 10 | 1 | 5 | 5 | 2 | 13 | 0.1 | 0.38 | 0.38 | 0.15 | 1.08 | 1 |
| DT | 88-1-D4x88-1-A2-2  | 1  | 1 | 3 | 7 | 0 | 11 | 0.1 | 0.27 | 0.64 | 0    | 1.09 | 1 |
| DT | 88-1-D4x88-1-A2-2  | 2  | 2 | 2 | 5 | 5 | 14 | 0.1 | 0.14 | 0.36 | 0.36 | 1.14 | 1 |
| DT | 88-1-D4x88-1-A2-2  | 3  | 3 | 5 | 4 | 2 | 14 | 0.2 | 0.36 | 0.29 | 0.14 | 1.21 | 0 |
| DT | 88-1-D4x88-1-A2-2  | 4  | 4 | 2 | 1 | 3 | 10 | 0.4 | 0.2  | 0.1  | 0.3  | 1.4  | 1 |
| DT | 88-1-D4x88-1-A2-2  | 5  | 1 | 4 | 5 | 2 | 12 | 0.1 | 0.33 | 0.42 | 0.17 | 1.08 | 1 |
| DT | 88-1-D4x88-1-A2-2  | 6  | 3 | 4 | 3 | 3 | 13 | 0.2 | 0.31 | 0.23 | 0.23 | 1.23 | 1 |
| DT | 88-1-D4x88-1-A2-2  | 7  | 1 | 0 | 8 | 5 | 14 | 0.1 | 0    | 0.57 | 0.36 | 1.07 | 1 |
| DT | 88-1-D4x88-1-A2-2  | 8  | 2 | 5 | 3 | 4 | 14 | 0.1 | 0.36 | 0.21 | 0.29 | 1.14 | 1 |
| DT | 88-1-D4x88-1-A2-6  | 1  | 5 | 2 | 2 | 2 | 11 | 0.5 | 0.18 | 0.18 | 0.18 | 1.45 | 1 |
| DT | 88-1-D4x88-1-A2-6  | 2  | 6 | 1 | 2 | 3 | 12 | 0.5 | 0.08 | 0.17 | 0.25 | 1.5  | 1 |
| DT | 88-1-D4x88-1-A2-6  | 4  | 1 | 4 | 6 | 1 | 12 | 0.1 | 0.33 | 0.5  | 0.08 | 1.08 | 1 |
| DT | 88-1-D4x88-1-A2-6  | 5  | 1 | 3 | 5 | 2 | 11 | 0.1 | 0.27 | 0.45 | 0.18 | 1.09 | 1 |
| DT | 88-1-D4x88-1-A2-6  | 6  | 0 | 3 | 6 | 5 | 14 | 0   | 0.21 | 0.43 | 0.36 | 1    | 1 |
| DT | 88-1-D4x88-1-A2-6  | 8  | 3 | 0 | 4 | 3 | 10 | 0.3 | 0    | 0.4  | 0.3  | 1.3  | 1 |
| DT | 88-1-D4x88-1-A2-7  | 1  | 2 | 1 | 6 | 3 | 12 | 0.2 | 0.08 | 0.5  | 0.25 | 1.17 | 0 |
| DT | 88-1-D4x88-1-A2-7  | 2  | 3 | 1 | 5 | 3 | 12 | 0.3 | 0.08 | 0.42 | 0.25 | 1.25 | 0 |
| DT | 88-1-D4x88-1-A2-7  | 3  | 1 | 2 | 2 | 6 | 11 | 0.1 | 0.18 | 0.18 | 0.55 | 1.09 | 1 |
| DT | 88-1-D4x88-1-A2-7  | 4  | 7 | 2 | 3 | 3 | 15 | 0.5 | 0.13 | 0.2  | 0.2  | 1.47 | 0 |
| DT | 88-1-D4x88-1-A2-7  | 5  | 1 | 4 | 5 | 0 | 10 | 0.1 | 0.4  | 0.5  | 0    | 1.1  | 1 |
| DT | 88-1-D4x88-1-A2-7  | 6  | 3 | 3 | 4 | 4 | 14 | 0.2 | 0.21 | 0.29 | 0.29 | 1.21 | 1 |
| DT | 88-1-D4x88-1-A2-7  | 7  | 7 | 2 | 5 | 1 | 15 | 0.5 | 0.13 | 0.33 | 0.07 | 1.47 | 0 |
| DT | 88-1-D4x88-1-A2-7  | 7  | 1 | 4 | 5 | 3 | 13 | 0.1 | 0.31 | 0.38 | 0.23 | 1.08 | 1 |
| DT | 88-1-D4x88-1-A2-7  | 8  | 1 | 3 | 6 | 2 | 12 | 0.1 | 0.25 | 0.5  | 0.17 | 1.08 | 0 |
| DT | 88-1-D4x88-1-A2-7  | 9  | 3 | 3 | 5 | 2 | 13 | 0.2 | 0.23 | 0.38 | 0.15 | 1.23 | 0 |
| DT | 88-1-D4x88-1-A2-9  | 1  | 3 | 1 | 6 | 2 | 12 | 0.3 | 0.08 | 0.5  | 0.17 | 1.25 | 1 |
| DT | 88-1-D4x88-1-A2-9  | 2  | 3 | 2 | 4 | 3 | 12 | 0.3 | 0.17 | 0.33 | 0.25 | 1.25 | 1 |
| DT | 88-1-D4x88-1-A2-9  | 3  | 1 | 2 | 4 | 3 | 10 | 0.1 | 0.2  | 0.4  | 0.3  | 1.1  | 1 |
| DT | 88-1-D4x88-1-A2-9  | 4  | 3 | 2 | 5 | 2 | 12 | 0.3 | 0.17 | 0.42 | 0.17 | 1.25 | 1 |
| DT | 88-1-D4x88-1-A2-9  | 5  | 3 | 4 | 1 | 3 | 11 | 0.3 | 0.36 | 0.09 | 0.27 | 1.27 | 1 |
| DT | 88-1-D4x88-1-A2-9  | 6  | 3 | 5 | 2 | 4 | 14 | 0.2 | 0.36 | 0.14 | 0.29 | 1.21 | 1 |
| DT | 88-1-D4x88-1-A2-9  | 7  | 2 | 5 | 4 | 2 | 13 | 0.2 | 0.38 | 0.31 | 0.15 | 1.15 | 1 |
| TD | 88-1-A4x88-1-A6-16 | 1  | 4 | 3 | 5 | 0 | 12 | 0.3 | 0.25 | 0.42 | 0    | 1.33 | 1 |
| TD | 88-1-A4x88-1-A6-16 | 2  | 1 | 2 | 4 | 6 | 13 | 0.1 | 0.15 | 0.31 | 0.46 | 1.08 | 1 |
| TD | 88-1-A4x88-1-A6-16 | 3  | 2 | 8 | 3 | 3 | 16 | 0.1 | 0.5  | 0.19 | 0.19 | 1.13 | 1 |
| TD | 88-1-A4x88-1-A6-16 | 4  | 1 | 6 | 3 | 1 | 11 | 0.1 | 0.55 | 0.27 | 0.09 | 1.09 | 1 |
| TD | 88-1-A4x88-1-A6-16 | 5  | 3 | 2 | 6 | 3 | 14 | 0.2 | 0.14 | 0.43 | 0.21 | 1.21 | 0 |
| TD | 88-1-A4x88-1-A6-16 | 6  | 2 | 6 | 2 | 4 | 14 | 0.1 | 0.43 | 0.14 | 0.29 | 1.14 | 0 |
| TD | 88-1-A4x88-1-A6-16 | 7  | 1 | 4 | 4 | 3 | 12 | 0.1 | 0.33 | 0.33 | 0.25 | 1.08 | 1 |
| TD | 88-1-A4x88-1-A6-16 | 8  | 2 | 3 | 1 | 4 | 10 | 0.2 | 0.3  | 0.1  | 0.4  | 1.2  | 1 |
| TD | 88-1-A4x88-1-A6-16 | 9  | 2 | 4 | 2 | 7 | 15 | 0.1 | 0.27 | 0.13 | 0.47 | 1.13 | 0 |

|    |                    |      |   |   |   |   |    |     |      |      |      |      |   |
|----|--------------------|------|---|---|---|---|----|-----|------|------|------|------|---|
| TD | 88-1-A4x88-1-A6-3  | 1    | 3 | 2 | 3 | 3 | 11 | 0.3 | 0.18 | 0.27 | 0.27 | 1.27 | 0 |
| TD | 88-1-A4x88-1-A6-3  | 1    | 1 | 3 | 5 | 2 | 11 | 0.1 | 0.27 | 0.45 | 0.18 | 1.09 | 1 |
| TD | 88-1-A4x88-1-A6-3  | 2    | 2 | 2 | 5 | 5 | 14 | 0.1 | 0.14 | 0.36 | 0.36 | 1.14 | 1 |
| TD | 88-1-A4x88-1-A6-3  | 3    | 1 | 2 | 5 | 4 | 12 | 0.1 | 0.17 | 0.42 | 0.33 | 1.08 | 1 |
| TD | 88-1-A4x88-1-A6-3  | 4    | 3 | 4 | 2 | 5 | 14 | 0.2 | 0.29 | 0.14 | 0.36 | 1.21 | 0 |
| TD | 88-1-A4x88-1-A6-3  | 5    | 0 | 3 | 8 | 3 | 14 | 0   | 0.21 | 0.57 | 0.21 | 1    | 1 |
| TD | 88-1-A4x88-1-A6-3  | 6    | 2 | 3 | 4 | 3 | 12 | 0.2 | 0.25 | 0.33 | 0.25 | 1.17 | 0 |
| TD | 88-1-A4x88-1-A6-3  | 8    | 2 | 2 | 2 | 6 | 12 | 0.2 | 0.17 | 0.17 | 0.5  | 1.17 | 1 |
| TD | 88-1-A4x88-1-A6-7  | 1    | 2 | 5 | 4 | 5 | 16 | 0.1 | 0.31 | 0.25 | 0.31 | 1.13 | 1 |
| TD | 88-1-A4x88-1-A6-7  | 3    | 1 | 5 | 5 | 1 | 12 | 0.1 | 0.42 | 0.42 | 0.08 | 1.08 | 0 |
| TD | 88-1-A4x88-1-A6-7  | 4    | 4 | 1 | 2 | 3 | 10 | 0.4 | 0.1  | 0.2  | 0.3  | 1.4  | 1 |
| TD | 88-1-A4x88-1-A6-7  | 5    | 3 | 4 | 3 | 1 | 11 | 0.3 | 0.36 | 0.27 | 0.09 | 1.27 | 1 |
| TD | 88-1-A4x88-1-A6-7  | 6    | 0 | 1 | 6 | 5 | 12 | 0   | 0.08 | 0.5  | 0.42 | 1    | 1 |
| TD | 88-1-A4x88-1-A6-7  | 7    | 2 | 4 | 5 | 2 | 13 | 0.2 | 0.31 | 0.38 | 0.15 | 1.15 | 1 |
| TD | 88-1-A4x88-1-A6-7  | 9    | 1 | 3 | 3 | 6 | 13 | 0.1 | 0.23 | 0.23 | 0.46 | 1.08 | 0 |
| TT | 88-1-A2x88-2-A3-10 | 1    | 0 | 4 | 5 | 5 | 14 | 0   | 0.29 | 0.36 | 0.36 | 1    | 0 |
| TT | 88-1-A2x88-2-A3-10 | 2    | 0 | 2 | 4 | 4 | 10 | 0   | 0.2  | 0.4  | 0.4  | 1    | 0 |
| TT | 88-1-A2x88-2-A3-10 | 3    | 0 | 2 | 5 | 4 | 11 | 0   | 0.18 | 0.45 | 0.36 | 1    | 0 |
| TT | 88-1-A2x88-2-A3-10 | 4    | 0 | 1 | 2 | 9 | 12 | 0   | 0.08 | 0.17 | 0.75 | 1    | 1 |
| TT | 88-1-A2x88-2-A3-10 | 5    | 0 | 2 | 8 | 2 | 12 | 0   | 0.17 | 0.67 | 0.17 | 1    | 0 |
| TT | 88-1-A2x88-2-A3-10 | 6    | 1 | 4 | 4 | 4 | 13 | 0.1 | 0.31 | 0.31 | 0.31 | 1.08 | 1 |
| TT | 88-1-A2x88-2-A3-7  | 1    | 0 | 5 | 3 | 7 | 15 | 0   | 0.33 | 0.2  | 0.47 | 1    | 0 |
| TT | 88-1-A2x88-2-A3-7  | 2    | 2 | 6 | 2 | 2 | 12 | 0.2 | 0.5  | 0.17 | 0.17 | 1.17 | 1 |
| TT | 88-1-A2x88-2-A3-7  | 3    | 0 | 3 | 7 | 3 | 13 | 0   | 0.23 | 0.54 | 0.23 | 1    | 0 |
| TT | 88-1-A2x88-2-A3-7  | 4    | 3 | 5 | 3 | 3 | 14 | 0.2 | 0.36 | 0.21 | 0.21 | 1.21 | 1 |
| TT | 88-1-A2x88-2-A3-7  | 5    | 2 | 1 | 6 | 2 | 11 | 0.2 | 0.09 | 0.55 | 0.18 | 1.18 | 1 |
| TT | 88-1-A2x88-2-A3-7  | 6    | 3 | 0 | 3 | 7 | 13 | 0.2 | 0    | 0.23 | 0.54 | 1.23 | 1 |
| TT | P1-68              | 1013 | 2 | 2 | 7 | 3 | 14 | 0.1 | 0.14 | 0.5  | 0.21 | 1.14 | 1 |
| TT | P1-68              | 1022 | 2 | 0 | 5 | 5 | 12 | 0.2 | 0    | 0.42 | 0.42 | 1.17 | 0 |
| TT | P1-68              | 1142 | 0 | 0 | 8 | 7 | 15 | 0   | 0    | 0.53 | 0.47 | 1    | 0 |
| TT | P1-68              | 1154 | 3 | 1 | 2 | 5 | 11 | 0.3 | 0.09 | 0.18 | 0.45 | 1.27 | 0 |
| TT | P1-68              | 1174 | 1 | 1 | 8 | 4 | 14 | 0.1 | 0.07 | 0.57 | 0.29 | 1.07 | 0 |
| TT | P1-68              | 1178 | 4 | 1 | 2 | 2 | 10 | 0.4 | 0.1  | 0.2  | 0.2  | 1.5  | 1 |
| TT | P1-68              | 1184 | 3 | 1 | 6 | 3 | 13 | 0.2 | 0.08 | 0.46 | 0.23 | 1.23 | 0 |
| TT | P1-68              | 1185 | 4 | 0 | 3 | 5 | 12 | 0.3 | 0    | 0.25 | 0.42 | 1.33 | 1 |
| TT | P1-68              | 1195 | 2 | 2 | 4 | 5 | 13 | 0.2 | 0.15 | 0.31 | 0.38 | 1.15 | 0 |
| TT | P1-68              | 1204 | 3 | 2 | 1 | 6 | 12 | 0.3 | 0.17 | 0.08 | 0.5  | 1.25 | 1 |

**Table S5 notes:** Primary phenotyping of metaphase spreads from plants segregating ASY1 and ASY3, experiment 2. Gen = genotype at both loci, where: DD = DDDD ASY1, DDDD ASY3; DT = DDDD ASY1, TTTT ASY3; TD = TTTT ASY1, DDDD ASY3; TT = TTTT ASY1, TTTT ASY3. All measures as for Table S1. All images are available at: doi: 10.3929/ethz-b-000386103

**Table S6:** Chi-squared test results for bivalent shape comparisons of tetraploids segregating D vs T alleles of ASY1 and ASY3

| <b>Comparison</b> | <b>p-value</b>                     |
|-------------------|------------------------------------|
| All Genotypes     | 5.82 × 10 <sup>-16</sup>           |
| <b>Comparison</b> | <b>Bonferroni adjusted p-value</b> |
| DD vs. DT         | 5.98 × 10 <sup>-03</sup>           |
| DD vs. TD         | 4.75 × 10 <sup>-05</sup>           |
| DD vs. TT         | 4.60 × 10 <sup>-15</sup>           |
| DT vs. TD         | 0.167                              |
| DT vs. TT         | 8.22 × 10 <sup>-09</sup>           |
| TD vs. TT         | 8.94 × 10 <sup>-03</sup>           |

**Chi-squared test results for MV rates**

| <b>Comparison</b> | <b>p-value</b> |
|-------------------|----------------|
| All Genotypes     | 0.318          |

**Fishers test**

| <b>comparison</b> | <b>Bonferroni adjusted p-value</b> |
|-------------------|------------------------------------|
| DD vs. DT         | 1                                  |
| DD vs. TD         | 1                                  |
| DD vs. TT         | 0.624                              |
| DT vs. TD         | 1                                  |
| DT vs. TT         | 1                                  |
| TD vs. TT         | 1                                  |

**Table S6 notes:** Results from post-hoc pairwise chi-squared tests with Bonferroni correction to determine if significant differences occurred between individual pairs of genotypes using bivalent count data from Table S1. For multivalent presence/absence data we used a Chi-squared test for the entire dataset and a Fishers exact test to compare all genotypes pairwise.

**Table S7:** Estimated trait means (number per cell) of different bivalent shapes and p-values from GLMMs for ASY1 and ASY3 D vs T

| Rod                       |          |           |            | Rod p values |        |         |        |
|---------------------------|----------|-----------|------------|--------------|--------|---------|--------|
|                           | Est mean | 2.5% Conf | 97.5% Conf |              | DD     | DT      | TD     |
| DD (7 plants, 73 cells)   | 2.2      | 1.82      | 2.66       | DD           |        |         |        |
| DT (10 plants, 114 cells) | 2.29     | 1.97      | 2.67       | DT           | 0.751  |         |        |
| TD (9 plants, 105 cells)  | 2.7      | 2.32      | 3.14       | TD           | 0.101  | 0.136   |        |
| TT (10 plants, 121 cells) | 3.29     | 2.88      | 3.76       | TT           | 0.0007 | 0.00047 | 0.0541 |

  

| Cross                     |          |           |            | Cross p values |        |        |       |
|---------------------------|----------|-----------|------------|----------------|--------|--------|-------|
|                           | Est mean | 2.5% Conf | 97.5% Conf |                | DD     | DT     | TD    |
| DD (7 plants, 73 cells)   | 2.59     | 1.81      | 3.71       | DD             |        |        |       |
| DT (10 plants, 114 cells) | 2.06     | 1.52      | 2.79       | DT             | 0.342  |        |       |
| TD (9 plants, 105 cells)  | 1.65     | 1.19      | 2.29       | TD             | 0.0677 | 0.325  |       |
| TT (10 plants, 121 cells) | 1.25     | 0.91      | 1.72       | TT             | 0.0029 | 0.0255 | 0.234 |

  

| Ring                      |          |           |            | Ring p values |        |        |       |
|---------------------------|----------|-----------|------------|---------------|--------|--------|-------|
|                           | Est mean | 2.5% Conf | 97.5% Conf |               | DD     | DT     | TD    |
| DD (7 plants, 73 cells)   | 1.95     | 1.54      | 2.45       | DD            |        |        |       |
| DT (10 plants, 114 cells) | 2.62     | 2.2       | 3.13       | DT            | 0.0442 |        |       |
| TD (9 plants, 105 cells)  | 2.32     | 1.91      | 2.81       | TD            | 0.2499 | 0.3549 |       |
| TT (10 plants, 121 cells) | 2.31     | 1.92      | 2.78       | TT            | 0.251  | 0.3266 | 0.976 |

  

| Bowtie                    |          |           |            | Bowtie p values |       |       |       |
|---------------------------|----------|-----------|------------|-----------------|-------|-------|-------|
|                           | Est mean | 2.5% Conf | 97.5% Conf |                 | DD    | DT    | TD    |
| DD (7 plants, 73 cells)   | 5.53     | 4.69      | 6.52       | DD              |       |       |       |
| DT (10 plants, 114 cells) | 5.44     | 4.74      | 6.24       | DT              | 0.88  |       |       |
| TD (9 plants, 105 cells)  | 5.81     | 5.05      | 6.7        | TD              | 0.652 | 0.508 |       |
| TT (10 plants, 121 cells) | 5.67     | 4.96      | 6.48       | TT              | 0.821 | 0.674 | 0.798 |

  

| MV                        |          |           |            | Multivalent p values |       |       |       |
|---------------------------|----------|-----------|------------|----------------------|-------|-------|-------|
|                           | Est mean | 2.5% Conf | 97.5% Conf |                      | DD    | DT    | TD    |
| DD (7 plants, 73 cells)   | 0.61     | 0.447     | 0.751      | DD                   |       |       |       |
| DT (10 plants, 114 cells) | 0.588    | 0.452     | 0.712      | DT                   | 0.836 |       |       |
| TD (9 plants, 105 cells)  | 0.554    | 0.417     | 0.684      | TD                   | 0.601 | 0.725 |       |
| TT (10 plants, 121 cells) | 0.461    | 0.337     | 0.59       | TT                   | 0.159 | 0.183 | 0.335 |

**Table S7 notes:** Trait means (left) and p-values (right) calculated from GLMM modeling. Normal approximations of 95% confidence intervals (range given from 2.5% Conf to 97.5% Conf) were calculated as 1.96 estimated standard errors.

**Table S8:** Quantitative measures from prophase I immunocytology of ASY1 and ASY3 segregants

|                                    | Mean                                      | TT                      | DT                     | TD                     | DD                     |
|------------------------------------|-------------------------------------------|-------------------------|------------------------|------------------------|------------------------|
| <b>Total SC per cell (microns)</b> | <b>Mean of all measurements</b>           | <b>478.74</b>           | <b>539.36</b>          | <b>503.99</b>          | <b>502.42</b>          |
|                                    |                                           | n=52<br>s.d.±(47.93784) | n=45<br>s.d.±(48.2761) | n=34<br>s.d.±(38.6811) | n=20<br>s.d.±(58.1761) |
|                                    | <b>Replicate 1</b>                        | <b>506.66</b>           | <b>520.47</b>          | <b>520.76</b>          | <b>487.56</b>          |
|                                    |                                           | n=12<br>s.d.±(34.9381)  | n=13<br>s.d.±(46.2886) | n=10<br>s.d.±(29.7365) | n=8<br>s.d.±(48.4238)  |
|                                    | <b>Replicate 2</b>                        | <b>509.96</b>           | <b>509.58</b>          | <b>471.37</b>          | <b>500.77</b>          |
|                                    |                                           | n=9<br>s.d.±(52.6656)   | n=9<br>s.d.±(34.5520)  | n=3<br>s.d.±(4.4906)   | n=12<br>s.d.±(63.9219) |
|                                    | <b>Replicate 3</b>                        | <b>492.18</b>           | <b>564.11</b>          | <b>458.24</b>          | <b>N/A</b>             |
|                                    |                                           | n=9<br>s.d.±(34.0380)   | n=13<br>s.d.±(42.2741) | n=8<br>s.d.±(25.7670)  | N/A                    |
|                                    | <b>Replicate 4</b>                        | <b>452.50</b>           | <b>558.54</b>          | <b>526.76</b>          | <b>N/A</b>             |
|                                    |                                           | n=11<br>s.d.±(31.5146)  | n=10<br>s.d.±(48.9661) | n=13<br>s.d.±(24.5601) | N/A                    |
|                                    | <b>Replicate 5</b>                        | <b>437.98</b>           |                        |                        |                        |
|                                    |                                           | n=11<br>s.d.±(40.9631)  |                        |                        |                        |
|                                    | <b>unweighted mean of replicate means</b> | <b>479.86</b>           | <b>538.17</b>          | <b>494.28</b>          | <b>500.77</b>          |
|                                    |                                           | ±(32.7060)              | ±(27.1919)             | ±(34.5445)             | ±(17.5135)             |
|                                    | <b>Nested ANOVA estimated mean</b>        | <b>479.62</b>           | <b>538.40</b>          | <b>496.93</b>          | <b>502.54</b>          |
|                                    |                                           | s.e.±(13.6113)          | s.e.±(15.1288)         | s.e.±(15.8562)         | s.e.±(21.6416)         |
|                                    |                                           |                         |                        |                        |                        |
| <b>Total HEI10 foci per cell</b>   | <b>Mean of all measurements</b>           | <b>19.02</b>            | <b>21.89</b>           | <b>20.59</b>           | <b>18.40</b>           |
|                                    |                                           | n=52<br>s.d.±(2.8179)   | n=45<br>s.d.±(3.8801)  | n=34<br>s.d.±(3.4034)  | n=20<br>s.d.±(2.4794)  |
|                                    | <b>Replicate 1</b>                        | <b>18.00</b>            | <b>18.23</b>           | <b>21.40</b>           | <b>18.00</b>           |
|                                    |                                           | n=12<br>s.d.±(3.0451)   | n=13<br>s.d.±(1.5359)  | n=10<br>s.d.±(3.2042)  | n=8<br>s.d.±(1.3093)   |
|                                    | <b>Replicate 2</b>                        | <b>19.89</b>            | <b>20.56</b>           | <b>22.67</b>           | <b>18.67</b>           |
|                                    |                                           | n=9<br>s.d.±(2.7131)    | n=9<br>s.d.±(2.0069)   | n=3<br>s.d.±(4.7258)   | n=12<br>s.d.±(3.0551)  |
|                                    | <b>Replicate 3</b>                        | <b>20.67</b>            | <b>23.92</b>           | <b>21.13</b>           | <b>N/A</b>             |
|                                    |                                           | n=9<br>s.d.±(3.0822)    | n=13<br>s.d.±(4.0715)  | n=8<br>s.d.±(3.8707)   | N/A                    |
|                                    | <b>Replicate 4</b>                        | <b>19.82</b>            | <b>25.20</b>           | <b>19.15</b>           | <b>N/A</b>             |
|                                    |                                           | n=11<br>s.d.±(2.6389)   | n=10<br>s.d.±(2.3476)  | n=13<br>s.d.±(2.7642)  | N/A                    |
|                                    | <b>Replicate 5</b>                        | <b>17.27</b>            |                        |                        |                        |
|                                    |                                           | n=11<br>s.d.±(1.1909)   |                        |                        |                        |
|                                    | <b>unweighted mean of replicate means</b> | <b>19.13</b>            | <b>21.98</b>           | <b>21.09</b>           | <b>18.36</b>           |
|                                    |                                           | ±(1.4263)               | ±(3.1744)              | ±(1.4528)              | ±(0.0471)              |
|                                    | <b>Nested ANOVA estimated mean</b>        | <b>19.11</b>            | <b>21.96</b>           | <b>20.93</b>           | <b>18.35</b>           |
|                                    |                                           | s.e.±(0.9139948)        | s.e.±(1.0156578)       | s.e.±(1.0659909)       | s.e.±(1.4535158)       |
|                                    |                                           |                         |                        |                        |                        |
| <b>Total SPS sites per cell</b>    | <b>Mean of all measurements</b>           | <b>5.13</b>             | <b>6.98</b>            | <b>6.09</b>            | <b>5.75</b>            |
|                                    |                                           | n=52<br>s.d.±(1.5085)   | n=45<br>s.d.±(1.9828)  | n=34<br>s.d.±(2.6442)  | n=20<br>s.d.±(2.3368)  |
|                                    | <b>Replicate 1</b>                        | <b>5.58</b>             | <b>6.92</b>            | <b>7.40</b>            | <b>5.75</b>            |
|                                    |                                           | n=12<br>s.d.±(1.8320)   | n=13<br>s.d.±(1.9348)  | n=10<br>s.d.±(2.1187)  | n=8<br>s.d.±(1.6690)   |

|                                                                        |                                           |                                          |                                         |                                         |                                         |
|------------------------------------------------------------------------|-------------------------------------------|------------------------------------------|-----------------------------------------|-----------------------------------------|-----------------------------------------|
|                                                                        | <b>Replicate 2</b>                        | <b>5.11</b><br>n=9<br>s.d.±(0.9280)      | <b>7.00</b><br>n=9 s.d.±(1.8708)        | <b>5.67</b><br>n=3 s.d.±(1.1547)        | <b>5.75</b><br>n=12<br>s.d.±(2.7675)    |
|                                                                        | <b>Replicate 3</b>                        | <b>5.11</b><br>n=9<br>s.d.±(1.4530)      | <b>7.08</b><br>n=13<br>s.d.±(2.4987)    | <b>5.13</b><br>n=8 s.d.±(2.1671)        | <b>N/A</b>                              |
|                                                                        | <b>Replicate 4</b>                        | <b>5.18</b><br>n=11<br>s.d.±(1.6624)     | <b>6.90</b><br>n=10<br>s.d.±(1.6633)    | <b>5.77</b><br>n=13<br>s.d.±(3.2699)    | <b>N/A</b>                              |
|                                                                        | <b>Replicate 5</b>                        | <b>4.64</b><br>n=11<br>s.d.±(1.5015)     |                                         |                                         |                                         |
|                                                                        | <b>unweighted mean of replicate means</b> | <b>5.12</b><br>±(0.3363)                 | <b>6.98</b><br>±(0.0803)                | <b>5.99</b><br>±(0.9814)                | <b>5.75</b><br>±(0.0000)                |
|                                                                        | <b>Nested ANOVA estimated mean</b>        | <b>5.13</b><br>s.e.±(0.2856045)          | <b>6.98</b><br>s.e.±(0.3070157)         | <b>6.09</b><br>s.e.±(0.3532054)         | <b>5.75</b><br>s.e.±(0.4605235)         |
|                                                                        |                                           |                                          |                                         |                                         |                                         |
| <b>Proportional distance of single HEI10 focus from chromosome end</b> | <b>Mean of all measurements</b>           | <b>0.30</b><br>n=620<br>s.d.±(0.1381)    | <b>0.30</b><br>n=403<br>s.d.±(0.1384)   | <b>0.31</b><br>n=345<br>s.d.±(0.1381)   | <b>0.30</b><br>n=235<br>s.d.±(0.1434)   |
|                                                                        | <b>Replicate 1</b>                        | <b>0.32</b><br>n=150<br>s.d.±(0.1307)    | <b>0.28</b><br>n=164<br>s.d.±(0.1545)   | <b>0.32</b><br>n=91<br>s.d.±(0.1175)    | <b>0.30</b><br>n=98<br>s.d.±(0.1416)    |
|                                                                        | <b>Replicate 2</b>                        | <b>0.27</b><br>n=102<br>s.d.±(0.1317)    | <b>0.31</b><br>n=91<br>s.d.±(0.1310)    | <b>0.34</b><br>n=23<br>s.d.±(0.1401)    | <b>0.29</b><br>n=137<br>s.d.±(0.1452)   |
|                                                                        | <b>Replicate 3</b>                        | <b>0.31</b><br>n=90<br>s.d.±(0.1424)     | <b>0.32</b><br>n=90<br>s.d.±(0.1192)    | <b>0.32</b><br>n=81<br>s.d.±(0.1489)    | <b>N/A</b>                              |
|                                                                        |                                           |                                          |                                         |                                         | <b>N/A</b>                              |
| <b>Physical distance of single HEI10 focus from chromosome end</b>     | <b>Mean of all measurements</b>           | <b>8.9852</b><br>n=620<br>s.d.±(4.5158)  | <b>9.7775</b><br>n=403<br>s.d.±(4.9554) | <b>9.5891</b><br>n=345<br>s.d.±(4.9163) | <b>9.1639</b><br>n=235<br>s.d.±(4.9434) |
|                                                                        | <b>Replicate 1</b>                        | <b>10.0662</b><br>n=150<br>s.d.±(4.5646) | <b>8.8229</b><br>n=164<br>s.d.±(5.3048) | <b>10.4621</b><br>n=91 s.d.±(4.6348)    | <b>9.1031</b><br>n=98<br>s.d.±(4.9191)  |
|                                                                        | <b>Replicate 2</b>                        | <b>8.4874</b><br>n=102<br>s.d.±(4.5862)  | <b>9.7196</b><br>n=91<br>s.d.±(4.7533)  | <b>10.4431</b><br>n=23<br>s.d.±(4.7404) | <b>9.2073</b><br>n=137<br>s.d.±(4.9783) |
|                                                                        | <b>Replicate 3</b>                        | <b>9.1695</b><br>n=90<br>s.d.±(4.5787)   | <b>11.0840</b><br>n=90<br>s.d.±(4.7811) | <b>8.6386</b><br>n=81<br>s.d.±(4.4868)  | <b>N/A</b>                              |
|                                                                        | <b>Replicate 4</b>                        | 9.0572<br>n=129<br>s.d.±(4.3372)         | 10.5399<br>n=58<br>s.d.±(3.9280)        | 9.4419<br>n=150<br>s.d.±(5.2543)        | <b>N/A</b>                              |
|                                                                        | <b>Replicate 5</b>                        | <b>8.0639</b><br>n=149<br>s.d.±(4.3413)  |                                         |                                         |                                         |
|                                                                        | <b>unweighted mean of replicate means</b> | 8.9689<br>±(0.7588)                      | 10.0416<br>±(0.9872)                    | 9.7464<br>±(0.8789)                     | 9.1552<br>±(0.0737)                     |
|                                                                        |                                           |                                          |                                         |                                         |                                         |
|                                                                        |                                           |                                          |                                         |                                         |                                         |

**Table S8 notes:** Replicates are different individual plants of each genotype (each shown in a different color). n = number of cells measured per individual (or pairs of chromosomes per individual for physical distance of HEI10 foci from nearest chromosomes end). s.d. = standard deviation from the mean.



Plants sampled are as follows (in order as listed in table above):

TT: 2T-33, 1T-4, 4T-3, 4T-18, 191 (2T-33, 1T-4, 191 were also sampled for metaphase)

DT: 1T-5, 3T-31, 4T-13, 4T-15 (4T-15 was also sampled for metaphase)

TD: 1T-17, 2T-25, 143, 171 (1T-17, 2T-25, 143 also sampled for metaphase)

DD: 1T-14, 1T-36 (1T-14 also sampled for metaphase)

## References

1. P. Monnahan *et al.*, Pervasive population genomic consequences of genome duplication in *Arabidopsis arenosa*. *Nat Ecol Evol* **3**, 457-468 (2019).
2. K. M. Wright *et al.*, Selection on meiosis genes in diploid and tetraploid *Arabidopsis arenosa*. *Mol Biol Evol* **32**, 944-955 (2015).
